# Supplementary material for: Multilevel thresholding with divergence measure and improved particle swarm optimization algorithm for crack image segmentation
Source: PubMed Central journal article supplement (PMC10984966; doi:10.1038/s41598-024-58456-2), 2024-04-01
Supplement: 41598_2024_58456_MOESM1_ESM.pdf [file 41598_2024_58456_MOESM1_ESM.pdf]

## Supplemental Material

The supplemental material includes 10 Tables, namely, Table S1-S10.

In Tables S1-S10, ‘numTh’ represents the number of thresholds. When ‘numTh’ is set to 2, 3, 5, 7, 9, 11, 15, and 20, multilevel thresholding experiments are performed on the test images. In a Table, the statistical mean values and the ranking of the evaluation metrics obtained by different algorithms on a test image are recorded. For statistical mean values of each metric, they are obtained by each algorithm over 20 runs independently. For each value of ‘numTh’, the top row records the statistical mean values of the metric, and the bottom row records the algorithm ranking on this metric. Meanwhile, the average ranking and overall ranking of each metric for different algorithms are also record in every Table.

From Tables S1-S10, we can observe that in most cases, the results obtained by the algorithm LSPIPSO proposed in this paper are superior to those of other compared algorithms. The data in Tables S1-S10 is the basic data for generating Figures 7-11 in the paper.

| Metric | numTh        | LSPIPSO     | PSO         | BFO         | GBMO        | EMA         | MWOA        | HWOA        | CSO         |       |
|--------|--------------|-------------|-------------|-------------|-------------|-------------|-------------|-------------|-------------|-------|
| RMSE   | 2            | 0.013579765 | 0.013627215 | 0.013611689 | 0.013609513 | 0.01363374  | 0.014366043 | 0.01363374  | 0.01363374  |       |
|        |              | 1           | 4           | 3           | 2           | 5           | 8           | 6           | 7           |       |
|        | 3            | 0.015382529 | 0.01549218  | 0.015473573 | 0.015364363 | 0.01551602  | 0.015747819 | 0.015519218 | 0.015517113 |       |
|        |              | 2           | 4           | 3           | 1           | 5           | 8           | 7           | 6           |       |
|        | 5            | 0.017902501 | 0.017847427 | 0.018212782 | 0.018395705 | 0.018542387 | 0.018538306 | 0.018552707 | 0.018555867 |       |
|        |              | 2           | 1           | 3           | 4           | 6           | 5           | 7           | 8           |       |
|        | 7            | 0.018251417 | 0.018556913 | 0.018938111 | 0.019327203 | 0.019840546 | 0.019780471 | 0.019807125 | 0.019837192 |       |
|        |              | 1           | 2           | 3           | 4           | 8           | 5           | 6           | 7           |       |
|        | 9            | 0.01795     | 0.018745    | 0.019952739 | 0.019877134 | 0.020725828 | 0.02076011  | 0.020672652 | 0.020691491 |       |
|        |              | 1           | 2           | 4           | 3           | 7           | 8           | 5           | 6           |       |
|        | 11           | 0.017254    | 0.018224    | 0.020496275 | 0.020337297 | 0.021388378 | 0.021354353 | 0.021339695 | 0.021337363 |       |
|        |              | 1           | 2           | 4           | 3           | 8           | 7           | 6           | 5           |       |
|        | 15           | 0.016523    | 0.016744    | 0.020116666 | 0.019425795 | 0.022293698 | 0.022197213 | 0.022225116 | 0.022171962 |       |
|        |              | 1           | 2           | 4           | 3           | 8           | 6           | 7           | 5           |       |
|        | 20           | 0.013688    | 0.014015    | 0.016819988 | 0.01605766  | 0.02115505  | 0.021140743 | 0.020987661 | 0.020917333 |       |
|        |              | 1           | 2           | 4           | 3           | 8           | 7           | 6           | 5           |       |
|        | Average rank |             | 1.25        | 2.375       | 3.5         | 2.875       | 6.875       | 6.75        | 6.25        | 6.125 |
|        | Overall rank |             | 1           | 2           | 4           | 3           | 8           | 7           | 6           | 5     |
| PSNR   | 2            | 37.33507967 | 37.3026339  | 37.31329311 | 37.31474973 | 37.29983082 | 36.8249565  | 37.29983082 | 37.29983082 |       |
|        |              | 1           | 4           | 3           | 2           | 5           | 8           | 6           | 7           |       |
|        | 3            | 36.25524373 | 36.19144248 | 36.20314813 | 36.26748123 | 36.18209352 | 36.05282949 | 36.18028062 | 36.18147899 |       |
|        |              | 2           | 4           | 3           | 1           | 5           | 8           | 7           | 6           |       |
|        | 5            | 34.9181232  | 34.95818981 | 34.79057246 | 34.70288581 | 34.63524069 | 34.63761273 | 34.63043757 | 34.62897388 |       |
|        |              | 2           | 1           | 3           | 4           | 6           | 5           | 7           | 8           |       |
|        | 7            | 34.73528169 | 34.59959988 | 34.44604164 | 34.27442745 | 34.04749559 | 34.0735713  | 34.06207672 | 34.04895715 |       |
|        |              | 1           | 2           | 3           | 4           | 8           | 5           | 6           | 7           |       |
|        | 9            | 34.8969946  | 34.53206136 | 33.99399364 | 34.02812928 | 33.66822989 | 33.65409504 | 33.69043226 | 33.68261203 |       |
|        |              | 1           | 2           | 4           | 3           | 7           | 8           | 5           | 6           |       |
|        | 11           | 35.23999906 | 34.76632626 | 33.74997742 | 33.82864231 | 33.39487298 | 33.40855823 | 33.41453421 | 33.41565386 |       |
|        |              | 1           | 2           | 4           | 3           | 8           | 7           | 6           | 5           |       |

|                     |                     |             |             |             |             |             |             |             |             |             |
|---------------------|---------------------|-------------|-------------|-------------|-------------|-------------|-------------|-------------|-------------|-------------|
|                     | <b>15</b>           | 35.61829505 | 35.47748834 | 33.91971858 | 34.22555335 | 33.03471521 | 33.07275086 | 33.06138538 | 33.0822236  |             |
|                     |                     | 1           | 2           | 4           | 3           | 8           | 6           | 7           | 5           |             |
|                     | <b>20</b>           | 37.27411967 | 37.05258093 | 35.4540459  | 35.87508654 | 33.49018748 | 33.49643883 | 33.55893496 | 33.58784059 |             |
|                     |                     | 1           | 2           | 4           | 3           | 8           | 7           | 6           | 5           |             |
|                     | <b>Average rank</b> | 1.25        | 2.375       | 3.5         | 2.875       | 6.875       | 6.75        | 6.25        | 6.125       |             |
| <b>Overall rank</b> | 1                   | 2           | 4           | 3           | 8           | 7           | 6           | 5           |             |             |
| <b>SSIM</b>         | <b>2</b>            | 0.935186784 | 0.93488438  | 0.934460054 | 0.934804526 | 0.934437368 | 0.929530866 | 0.934437368 | 0.934437368 |             |
|                     |                     | 1           | 2           | 4           | 3           | 5           | 8           | 6           | 7           |             |
|                     | <b>3</b>            | 0.92887556  | 0.924152797 | 0.927705909 | 0.92868954  | 0.927071938 | 0.926960236 | 0.92703946  | 0.927060911 |             |
|                     |                     | 1           | 8           | 3           | 2           | 4           | 7           | 6           | 5           |             |
|                     | <b>5</b>            | 0.913990379 | 0.914745382 | 0.911867379 | 0.910822268 | 0.908779334 | 0.90979603  | 0.908693534 | 0.908670545 |             |
|                     |                     | 2           | 1           | 3           | 4           | 6           | 5           | 7           | 8           |             |
|                     | <b>7</b>            | 0.912304648 | 0.910291257 | 0.907531937 | 0.905083247 | 0.900407268 | 0.901219646 | 0.900669232 | 0.900441346 |             |
|                     |                     | 1           | 2           | 3           | 4           | 8           | 5           | 6           | 7           |             |
|                     | <b>9</b>            | 0.914705868 | 0.909588952 | 0.900691364 | 0.901529957 | 0.89460615  | 0.89465215  | 0.895011205 | 0.894898261 |             |
|                     |                     | 1           | 2           | 4           | 3           | 8           | 7           | 5           | 6           |             |
|                     | <b>11</b>           | 0.919265919 | 0.912996783 | 0.896883921 | 0.89836453  | 0.890211004 | 0.890621348 | 0.890560366 | 0.890651426 |             |
|                     |                     | 1           | 2           | 4           | 3           | 8           | 6           | 7           | 5           |             |
|                     | <b>15</b>           | 0.923516888 | 0.921447707 | 0.899063053 | 0.904269383 | 0.884087263 | 0.884860729 | 0.884599582 | 0.885050515 |             |
|                     |                     | 1           | 2           | 4           | 3           | 8           | 6           | 7           | 5           |             |
|                     | <b>20</b>           | 0.936056398 | 0.934266521 | 0.918257124 | 0.922950059 | 0.891730638 | 0.891808718 | 0.892974121 | 0.893398407 |             |
|                     |                     | 1           | 2           | 4           | 3           | 8           | 7           | 6           | 5           |             |
|                     | <b>Average rank</b> | 1.125       | 2.625       | 3.625       | 3.125       | 6.875       | 6.375       | 6.25        | 6           |             |
|                     | <b>Overall rank</b> | 1           | 2           | 4           | 3           | 8           | 7           | 6           | 5           |             |
|                     | <b>FSIM</b>         | <b>2</b>    | 0.330155977 | 0.33144628  | 0.324587452 | 0.328588609 | 0.325598493 | 0.339409614 | 0.325598493 | 0.325598493 |
|                     |                     |             | 3           | 2           | 8           | 4           | 5           | 1           | 6           | 7           |
| <b>3</b>            |                     | 0.40426959  | 0.405705277 | 0.396467053 | 0.400065869 | 0.387648236 | 0.405082526 | 0.387158254 | 0.387496742 |             |
|                     |                     | 3           | 1           | 5           | 4           | 6           | 2           | 8           | 7           |             |
| <b>5</b>            |                     | 0.442160285 | 0.447102373 | 0.43201561  | 0.421991865 | 0.396226236 | 0.415919531 | 0.395211072 | 0.394731013 |             |
|                     |                     | 2           | 1           | 3           | 4           | 6           | 5           | 7           | 8           |             |
| <b>7</b>            |                     | 0.482726485 | 0.478737254 | 0.466116132 | 0.448329619 | 0.399732131 | 0.417774679 | 0.402800265 | 0.400393644 |             |
|                     |                     | 1           | 2           | 3           | 4           | 8           | 5           | 6           | 7           |             |
| <b>9</b>            |                     | 0.540626656 | 0.523817052 | 0.458343254 | 0.47298537  | 0.401967985 | 0.41438098  | 0.407232467 | 0.406108661 |             |
|                     |                     | 1           | 2           | 4           | 3           | 8           | 5           | 6           | 7           |             |
| <b>11</b>           |                     | 0.589652117 | 0.55508922  | 0.449582866 | 0.475261242 | 0.401653968 | 0.418257574 | 0.406267433 | 0.408698241 |             |
|                     |                     | 1           | 2           | 4           | 3           | 8           | 5           | 7           | 6           |             |
| <b>15</b>           |                     | 0.637810062 | 0.626295665 | 0.483127353 | 0.53659285  | 0.397659815 | 0.417137589 | 0.405721639 | 0.414160677 |             |
|                     |                     | 1           | 2           | 4           | 3           | 8           | 5           | 7           | 6           |             |
| <b>20</b>           |                     | 0.66399082  | 0.654588518 | 0.593668585 | 0.612586795 | 0.406088399 | 0.426349044 | 0.420624428 | 0.43640908  |             |
|                     |                     | 1           | 2           | 4           | 3           | 8           | 6           | 7           | 5           |             |
| <b>Average rank</b> |                     | 1.625       | 1.75        | 4.375       | 3.5         | 7.125       | 4.25        | 6.75        | 6.625       |             |
| <b>Overall rank</b> |                     | 1           | 2           | 5           | 3           | 8           | 4           | 7           | 6           |             |

**Table S1.** The comparison of statistical results of the values of performance evaluation metrics for all algorithms on test image ‘img1’.

| Metric | numTh        | LSPIPSO     | PSO         | BFO         | GBMO        | EMA         | MWOA        | HWOA        | CSO         |
|--------|--------------|-------------|-------------|-------------|-------------|-------------|-------------|-------------|-------------|
| RMSE   | 2            | 0.016789231 | 0.016779616 | 0.01671361  | 0.016702685 | 0.016718574 | 0.017022245 | 0.016718574 | 0.016718574 |
|        |              | 7           | 6           | 2           | 1           | 3           | 8           | 4           | 5           |
|        | 3            | 0.018106313 | 0.018145001 | 0.018301037 | 0.01833695  | 0.018420482 | 0.018389951 | 0.018420443 | 0.018420749 |
|        |              | 1           | 2           | 3           | 4           | 7           | 5           | 6           | 8           |
|        | 5            | 0.01969191  | 0.019492778 | 0.019851822 | 0.020177351 | 0.020565273 | 0.0203605   | 0.02056417  | 0.020565123 |
|        |              | 2           | 1           | 3           | 4           | 8           | 5           | 6           | 7           |
|        | 7            | 0.018679137 | 0.019673396 | 0.020023787 | 0.020581495 | 0.021456467 | 0.021345325 | 0.021436989 | 0.021449958 |
|        |              | 1           | 2           | 3           | 4           | 8           | 5           | 6           | 7           |
|        | 9            | 0.018075058 | 0.018568422 | 0.020245945 | 0.020591129 | 0.022071946 | 0.021887898 | 0.022039127 | 0.022046297 |
|        |              | 1           | 2           | 3           | 4           | 8           | 5           | 6           | 7           |
|        | 11           | 0.016784194 | 0.017813806 | 0.020297419 | 0.020196387 | 0.022533239 | 0.022335852 | 0.022486436 | 0.022448058 |
|        |              | 1           | 2           | 4           | 3           | 8           | 5           | 7           | 6           |
|        | 15           | 0.015435167 | 0.016319383 | 0.018953695 | 0.018602452 | 0.023138027 | 0.022918496 | 0.023029698 | 0.022898475 |
|        |              | 1           | 2           | 4           | 3           | 8           | 6           | 7           | 5           |
|        | 20           | 0.012805913 | 0.013328212 | 0.016970319 | 0.015422101 | 0.02231598  | 0.022117888 | 0.022146291 | 0.02165973  |
|        |              | 1           | 2           | 4           | 3           | 8           | 6           | 7           | 5           |
|        | Average rank | 1.875       | 2.375       | 3.25        | 3.25        | 7.25        | 5.625       | 6.125       | 6.25        |
|        | Overall rank | 1           | 2           | 3           | 4           | 8           | 5           | 6           | 7           |
| PSNR   | 2            | 35.49459253 | 35.49883795 | 35.53427678 | 35.54025969 | 35.53178815 | 35.37448739 | 35.53178815 | 35.53178815 |
|        |              | 7           | 6           | 2           | 1           | 3           | 8           | 4           | 5           |
|        | 3            | 34.82257761 | 34.81831091 | 34.74656267 | 34.72995823 | 34.69034264 | 34.70439468 | 34.69036781 | 34.6902191  |
|        |              | 1           | 2           | 3           | 4           | 7           | 5           | 6           | 8           |
|        | 5            | 34.10868353 | 34.19383082 | 34.0356074  | 33.8997311  | 33.73461242 | 33.82121997 | 33.73508758 | 33.73467265 |
|        |              | 2           | 1           | 3           | 4           | 8           | 5           | 6           | 7           |
|        | 7            | 34.51910531 | 34.11363961 | 33.95844561 | 33.7285504  | 33.36646194 | 33.41169175 | 33.37433363 | 33.36907407 |
|        |              | 1           | 2           | 3           | 4           | 8           | 5           | 6           | 7           |
|        | 9            | 34.83142146 | 34.61202481 | 33.85756398 | 33.720252   | 33.12097482 | 33.19309431 | 33.13378548 | 33.13107723 |
|        |              | 1           | 2           | 3           | 4           | 8           | 5           | 6           | 7           |
|        | 11           | 35.49571095 | 34.97009784 | 33.83043    | 33.89151441 | 32.94135205 | 33.0172122  | 32.95934543 | 32.97427452 |
|        |              | 1           | 2           | 4           | 3           | 8           | 5           | 7           | 6           |
|        | 15           | 36.2118861  | 35.73935676 | 34.39936665 | 34.60201521 | 32.71143402 | 32.79384831 | 32.75214232 | 32.80148627 |
|        |              | 1           | 2           | 4           | 3           | 8           | 6           | 7           | 5           |
|        | 20           | 37.84334649 | 37.48833837 | 35.36955413 | 36.2383308  | 33.02542851 | 33.10236325 | 33.09165081 | 33.2838106  |
|        |              | 1           | 2           | 4           | 3           | 8           | 6           | 7           | 5           |
|        | Average rank | 1.875       | 2.375       | 3.25        | 3.25        | 7.25        | 5.625       | 6.125       | 6.25        |
|        | Overall rank | 1           | 2           | 3           | 4           | 8           | 5           | 6           | 7           |
| SSIM   | 2            | 0.901954875 | 0.902269344 | 0.902464634 | 0.90259794  | 0.902494529 | 0.901093979 | 0.902494529 | 0.902494529 |
|        |              | 7           | 6           | 5           | 1           | 2           | 8           | 3           | 4           |
|        | 3            | 0.902782444 | 0.902349141 | 0.901816779 | 0.901454328 | 0.90080113  | 0.901092343 | 0.900801356 | 0.900799703 |
|        |              | 1           | 2           | 3           | 4           | 7           | 5           | 6           | 8           |
|        | 5            | 0.893180718 | 0.895060895 | 0.891987476 | 0.888818567 | 0.885862137 | 0.887340624 | 0.885898374 | 0.885875571 |
|        |              | 2           | 1           | 3           | 4           | 8           | 5           | 6           | 7           |
|        | 7            | 0.900573762 | 0.89333858  | 0.889126288 | 0.885036815 | 0.877545465 | 0.878243976 | 0.877710208 | 0.877612163 |
|        |              | 1           | 2           | 3           | 4           | 8           | 5           | 6           | 7           |

|             |                     |             |             |             |             |             |             |             |             |
|-------------|---------------------|-------------|-------------|-------------|-------------|-------------|-------------|-------------|-------------|
|             | <b>9</b>            | 0.906773581 | 0.90225235  | 0.887160899 | 0.884051458 | 0.871195466 | 0.872635049 | 0.8714401   | 0.871390592 |
|             |                     | 1           | 2           | 3           | 4           | 8           | 5           | 6           | 7           |
|             | <b>11</b>           | 0.917636717 | 0.909385592 | 0.884788067 | 0.88785291  | 0.866082313 | 0.86770084  | 0.866448568 | 0.866749876 |
|             |                     | 1           | 2           | 4           | 3           | 8           | 5           | 7           | 6           |
|             | <b>15</b>           | 0.926788    | 0.920342191 | 0.897084906 | 0.901994729 | 0.858780001 | 0.860978667 | 0.859758975 | 0.86084299  |
|             |                     | 1           | 2           | 4           | 3           | 8           | 5           | 7           | 6           |
|             | <b>20</b>           | 0.938045241 | 0.93553088  | 0.913308421 | 0.921763248 | 0.867807577 | 0.869882419 | 0.869557959 | 0.873912073 |
|             |                     | 1           | 2           | 4           | 3           | 8           | 6           | 7           | 5           |
|             | <b>Average rank</b> | 1.875       | 2.375       | 3.625       | 3.25        | 7.125       | 5.5         | 6           | 6.25        |
|             | <b>Overall rank</b> | 1           | 2           | 4           | 3           | 8           | 5           | 6           | 7           |
| <b>FSIM</b> | <b>2</b>            | 0.478340235 | 0.480976688 | 0.472296279 | 0.477324686 | 0.474657501 | 0.505927456 | 0.474657501 | 0.474657501 |
|             |                     | 3           | 2           | 8           | 4           | 5           | 1           | 6           | 7           |
|             | <b>3</b>            | 0.593439925 | 0.596727027 | 0.587544456 | 0.590202517 | 0.578852876 | 0.591811777 | 0.578897714 | 0.578784004 |
|             |                     | 2           | 1           | 5           | 4           | 7           | 3           | 6           | 8           |
|             | <b>5</b>            | 0.625137517 | 0.629851974 | 0.634297359 | 0.622473308 | 0.601265244 | 0.614770422 | 0.601922417 | 0.601161549 |
|             |                     | 3           | 2           | 1           | 4           | 7           | 5           | 6           | 8           |
|             | <b>7</b>            | 0.643157014 | 0.630301486 | 0.622842395 | 0.621897401 | 0.603690475 | 0.622264156 | 0.607003307 | 0.605345639 |
|             |                     | 1           | 2           | 3           | 5           | 8           | 4           | 6           | 7           |
|             | <b>9</b>            | 0.659462717 | 0.640211869 | 0.600701799 | 0.595183958 | 0.609860362 | 0.627329379 | 0.613406672 | 0.614084072 |
|             |                     | 1           | 2           | 7           | 8           | 6           | 3           | 5           | 4           |
|             | <b>11</b>           | 0.699185067 | 0.676388633 | 0.573300733 | 0.602832968 | 0.602757253 | 0.617107299 | 0.606748066 | 0.611448433 |
|             |                     | 1           | 2           | 8           | 6           | 7           | 3           | 5           | 4           |
|             | <b>15</b>           | 0.731184506 | 0.713882105 | 0.62856422  | 0.659684287 | 0.58456477  | 0.589491797 | 0.590556673 | 0.589741915 |
|             |                     | 1           | 2           | 4           | 3           | 8           | 7           | 5           | 6           |
|             | <b>20</b>           | 0.734720047 | 0.730241988 | 0.69206787  | 0.698002521 | 0.600526075 | 0.602261293 | 0.612184937 | 0.610737434 |
|             |                     | 1           | 2           | 4           | 3           | 8           | 7           | 5           | 6           |
|             | <b>Average rank</b> | 1.625       | 1.875       | 5           | 4.625       | 7           | 4.125       | 5.5         | 6.25        |
|             | <b>Overall rank</b> | 1           | 2           | 5           | 4           | 8           | 3           | 6           | 7           |

**Table S2.** The comparison of statistical results of the values of performance evaluation metrics for all algorithms on test image ‘img2’.

| Metric      | numTh     | LSPISO      | PSO         | BFO         | GBMO        | EMA         | MWOA        | HWOA        | CSO         |
|-------------|-----------|-------------|-------------|-------------|-------------|-------------|-------------|-------------|-------------|
| <b>RMSE</b> | <b>2</b>  | 0.016429018 | 0.016602764 | 0.016308564 | 0.016216389 | 0.016686496 | 0.018748005 | 0.016246134 | 0.016246134 |
|             |           | 5           | 6           | 4           | 1           | 7           | 8           | 2           | 3           |
|             | <b>3</b>  | 0.01693909  | 0.016986103 | 0.016617539 | 0.016740733 | 0.016837165 | 0.018251809 | 0.016266157 | 0.016266114 |
|             |           | 6           | 7           | 3           | 4           | 5           | 8           | 2           | 1           |
|             | <b>5</b>  | 0.017889299 | 0.018526099 | 0.018321251 | 0.01846433  | 0.017707453 | 0.018316199 | 0.017289905 | 0.017290728 |
|             |           | 4           | 8           | 6           | 7           | 3           | 5           | 1           | 2           |
|             | <b>7</b>  | 0.018275513 | 0.01819398  | 0.019177325 | 0.018733431 | 0.018459994 | 0.018503579 | 0.017983545 | 0.017883978 |
|             |           | 4           | 3           | 8           | 7           | 5           | 6           | 2           | 1           |
|             | <b>9</b>  | 0.018022163 | 0.018510309 | 0.019368639 | 0.019139994 | 0.018787978 | 0.018867576 | 0.018601996 | 0.018407315 |
|             |           | 1           | 3           | 8           | 7           | 5           | 6           | 4           | 2           |
|             | <b>11</b> | 0.017731909 | 0.018044274 | 0.019344288 | 0.019059961 | 0.01917648  | 0.019162364 | 0.018894726 | 0.018772789 |
|             |           | 1           | 2           | 8           | 5           | 7           | 6           | 4           | 3           |
|             | <b>15</b> | 0.016744723 | 0.017438229 | 0.019311768 | 0.01858154  | 0.019583095 | 0.019663905 | 0.019303525 | 0.01931123  |

|      |              |              |             |             |             |             |             |             |             |             |
|------|--------------|--------------|-------------|-------------|-------------|-------------|-------------|-------------|-------------|-------------|
|      |              | 1            | 2           | 6           | 3           | 7           | 8           | 4           | 5           |             |
|      | 20           | 0.013509943  | 0.013908033 | 0.018063931 | 0.015379968 | 0.019557594 | 0.019389268 | 0.018731474 | 0.019037254 |             |
|      |              | 1            | 2           | 4           | 3           | 8           | 7           | 5           | 6           |             |
|      | Average rank | 2.875        | 4.125       | 5.875       | 4.625       | 5.875       | 6.75        | 3           | 2.875       |             |
|      | Overall rank | 1            | 4           | 6           | 5           | 7           | 8           | 3           | 2           |             |
| PSNR | 2            | 35.6689598   | 35.57048133 | 35.73889326 | 35.79063645 | 35.5215106  | 34.50261268 | 35.77535892 | 35.77535892 |             |
|      |              | 5            | 6           | 4           | 1           | 7           | 8           | 2           | 3           |             |
|      | 3            | 35.34213717  | 35.3565868  | 35.5691884  | 35.47791631 | 35.43091862 | 34.71295516 | 35.7616706  | 35.76169643 |             |
|      |              | 7            | 6           | 3           | 4           | 5           | 8           | 2           | 1           |             |
|      | 5            | 34.93858168  | 34.61961508 | 34.70536448 | 34.63073065 | 35.00474252 | 34.68851163 | 35.23123143 | 35.23080998 |             |
|      |              | 4            | 8           | 5           | 7           | 3           | 6           | 1           | 2           |             |
|      | 7            | 34.74273811  | 34.76100097 | 34.33224725 | 34.53014952 | 34.6368203  | 34.61121898 | 34.88401284 | 34.93659674 |             |
|      |              | 4            | 3           | 8           | 7           | 5           | 6           | 2           | 1           |             |
|      | 9            | 34.86443097  | 34.62793156 | 34.23668895 | 34.3456118  | 34.4908133  | 34.45261925 | 34.581709   | 34.68156684 |             |
|      |              | 1            | 3           | 8           | 7           | 5           | 6           | 4           | 2           |             |
|      | 11           | 34.98231868  | 34.83568047 | 34.25044483 | 34.37977414 | 34.31823764 | 34.33151101 | 34.4485891  | 34.51066757 |             |
|      |              | 1            | 2           | 8           | 5           | 7           | 6           | 4           | 3           |             |
|      | 15           | 35.50337168  | 35.16733917 | 34.27191896 | 34.60838109 | 34.14449838 | 34.11176011 | 34.26699295 | 34.26774343 |             |
|      |              | 1            | 2           | 4           | 3           | 7           | 8           | 6           | 5           |             |
|      | 20           | 37.3217737   | 37.10730069 | 34.81199267 | 36.21524526 | 34.15663505 | 34.23546742 | 34.53030414 | 34.38986053 |             |
|      |              | 1            | 2           | 4           | 3           | 8           | 7           | 5           | 6           |             |
|      |              | Average rank | 3           | 4           | 5.5         | 4.625       | 5.875       | 6.875       | 3.25        | 2.875       |
|      |              | Overall rank | 2           | 4           | 6           | 5           | 7           | 8           | 3           | 1           |
|      | SSIM         | 2            | 0.892508179 | 0.893898246 | 0.891533899 | 0.890724185 | 0.894425544 | 0.913119678 | 0.891046658 | 0.891046658 |
|      |              |              | 4           | 3           | 5           | 8           | 2           | 1           | 6           | 7           |
| 3    |              | 0.924712107  | 0.923767148 | 0.924201161 | 0.923724335 | 0.923558579 | 0.922778729 | 0.924221115 | 0.924221681 |             |
|      |              | 1            | 5           | 4           | 6           | 7           | 8           | 3           | 2           |             |
| 5    |              | 0.931512917  | 0.92839705  | 0.929399324 | 0.928263885 | 0.931937859 | 0.928909077 | 0.934251959 | 0.934242886 |             |
|      |              | 4            | 7           | 5           | 8           | 3           | 6           | 1           | 2           |             |
| 7    |              | 0.931548313  | 0.931399266 | 0.925710322 | 0.92859266  | 0.929574867 | 0.929516694 | 0.9328173   | 0.933506956 |             |
|      |              | 3            | 4           | 8           | 7           | 5           | 6           | 2           | 1           |             |
| 9    |              | 0.933831666  | 0.930909138 | 0.924210306 | 0.926479192 | 0.928242369 | 0.927886286 | 0.929619424 | 0.931165204 |             |
|      |              | 1            | 3           | 8           | 7           | 5           | 6           | 4           | 2           |             |
| 11   |              | 0.935607518  | 0.933854815 | 0.924659366 | 0.92739675  | 0.925805213 | 0.926111539 | 0.928017771 | 0.929152941 |             |
|      |              | 1            | 2           | 8           | 5           | 7           | 6           | 4           | 3           |             |
| 15   |              | 0.941997836  | 0.938247114 | 0.92469267  | 0.930819134 | 0.922809077 | 0.922281718 | 0.925203845 | 0.925446213 |             |
|      |              | 1            | 2           | 6           | 3           | 7           | 8           | 5           | 4           |             |
| 20   |              | 0.955624784  | 0.953886636 | 0.931341284 | 0.94670634  | 0.922846559 | 0.924210996 | 0.929173538 | 0.9271486   |             |
|      |              | 1            | 2           | 4           | 3           | 8           | 7           | 5           | 6           |             |
|      |              | Average rank | 2           | 3.5         | 6           | 5.875       | 5.5         | 6           | 3.75        | 3.375       |
|      |              | Overall rank | 1           | 3           | 7           | 6           | 5           | 8           | 4           | 2           |
| FSIM |              | 2            | 0.440960647 | 0.431415134 | 0.436985683 | 0.440606508 | 0.418039001 | 0.340682961 | 0.436539326 | 0.436539326 |
|      |              |              | 1           | 6           | 3           | 2           | 7           | 8           | 4           | 5           |
|      | 3            | 0.5092607    | 0.514855086 | 0.541943133 | 0.522955815 | 0.508474218 | 0.429296493 | 0.545152546 | 0.545142969 |             |
|      |              | 6            | 5           | 3           | 4           | 7           | 8           | 1           | 2           |             |

|              |             |             |             |             |             |             |             |             |
|--------------|-------------|-------------|-------------|-------------|-------------|-------------|-------------|-------------|
| 5            | 0.502949379 | 0.468024287 | 0.50062951  | 0.468343927 | 0.525124658 | 0.489880383 | 0.564445513 | 0.562998331 |
|              | 4           | 8           | 5           | 7           | 3           | 6           | 1           | 2           |
| 7            | 0.521983793 | 0.508943792 | 0.424855445 | 0.479836317 | 0.496840071 | 0.515530818 | 0.554388737 | 0.566035136 |
|              | 3           | 5           | 8           | 7           | 6           | 4           | 2           | 1           |
| 9            | 0.532922165 | 0.507688565 | 0.374106136 | 0.434072979 | 0.496408689 | 0.503287048 | 0.522474963 | 0.560524602 |
|              | 2           | 4           | 8           | 7           | 6           | 5           | 3           | 1           |
| 11           | 0.579061835 | 0.551828551 | 0.393367803 | 0.452315123 | 0.47085791  | 0.481795083 | 0.515711166 | 0.55872537  |
|              | 1           | 3           | 8           | 7           | 6           | 5           | 4           | 2           |
| 15           | 0.690899751 | 0.643701266 | 0.376347523 | 0.524234187 | 0.425220056 | 0.414083464 | 0.494501484 | 0.51772536  |
|              | 1           | 2           | 8           | 3           | 6           | 7           | 5           | 4           |
| 20           | 0.712021847 | 0.704024982 | 0.44762911  | 0.612380579 | 0.392568163 | 0.416792138 | 0.53293346  | 0.489633899 |
|              | 1           | 2           | 6           | 3           | 8           | 7           | 4           | 5           |
| Average rank | 2.375       | 4.375       | 6.125       | 5           | 6.125       | 6.25        | 3           | 2.75        |
| Overall rank | 1           | 4           | 6           | 5           | 7           | 8           | 3           | 2           |

**Table S3.** The comparison of statistical results of the values of performance evaluation metrics for all algorithms on test image ‘img3’.

| Metric       | numTh       | LSPIPSO     | PSO         | BFO         | GBMO        | EMA         | MWOA        | HWOA        | CSO         |
|--------------|-------------|-------------|-------------|-------------|-------------|-------------|-------------|-------------|-------------|
| RMSE         | 2           | 0.024372687 | 0.024160429 | 0.024414164 | 0.024429857 | 0.024432188 | 0.024413542 | 0.024432188 | 0.024432188 |
|              |             | 2           | 1           | 4           | 5           | 6           | 3           | 7           | 8           |
|              | 3           | 0.024808652 | 0.02488675  | 0.024895116 | 0.024964075 | 0.025044566 | 0.024969517 | 0.025044513 | 0.025045319 |
|              |             | 1           | 2           | 3           | 4           | 7           | 5           | 6           | 8           |
|              | 5           | 0.024551547 | 0.023923472 | 0.024999919 | 0.025257677 | 0.025734145 | 0.025660025 | 0.025739002 | 0.025742386 |
|              |             | 2           | 1           | 3           | 4           | 6           | 5           | 7           | 8           |
|              | 7           | 0.022133306 | 0.023431864 | 0.024698984 | 0.025023438 | 0.02603863  | 0.025926193 | 0.026024206 | 0.026036708 |
|              |             | 1           | 2           | 3           | 4           | 8           | 5           | 6           | 7           |
|              | 9           | 0.020257886 | 0.021107247 | 0.024234823 | 0.024232746 | 0.026232426 | 0.026109859 | 0.026206831 | 0.026196908 |
|              |             | 1           | 2           | 4           | 3           | 8           | 5           | 7           | 6           |
|              | 11          | 0.019152286 | 0.02002218  | 0.023792844 | 0.023188529 | 0.026369261 | 0.026247636 | 0.026328252 | 0.026265329 |
|              |             | 1           | 2           | 4           | 3           | 8           | 5           | 7           | 6           |
|              | 15          | 0.017317051 | 0.018115297 | 0.022177565 | 0.021099895 | 0.026441111 | 0.026367047 | 0.026441917 | 0.026244346 |
|              |             | 1           | 2           | 4           | 3           | 7           | 6           | 8           | 5           |
| 20           | 0.013780014 | 0.014562351 | 0.018975322 | 0.016701596 | 0.026213352 | 0.026118086 | 0.026102233 | 0.025603288 |             |
|              | 1           | 2           | 4           | 3           | 8           | 7           | 6           | 5           |             |
| Average rank | 1.25        | 1.75        | 3.625       | 3.625       | 7.25        | 5.125       | 6.75        | 6.625       |             |
| Overall rank | 1           | 2           | 3           | 4           | 8           | 5           | 7           | 6           |             |
| PSNR         | 2           | 32.25507363 | 32.32124685 | 32.24072844 | 32.23543352 | 32.23461407 | 32.24100753 | 32.23461407 | 32.23461407 |
|              |             | 2           | 1           | 4           | 5           | 6           | 3           | 7           | 8           |
|              | 3           | 32.10086186 | 32.07294793 | 32.07032986 | 32.0468719  | 32.01899775 | 32.04460261 | 32.01902123 | 32.01873191 |
|              |             | 1           | 2           | 3           | 4           | 7           | 5           | 6           | 8           |
|              | 5           | 32.18907682 | 32.40733934 | 32.02994725 | 31.94341101 | 31.78223972 | 31.80680779 | 31.78055751 | 31.77940724 |
|              |             | 2           | 1           | 3           | 4           | 6           | 5           | 7           | 8           |
|              | 7           | 33.09203613 | 32.59275922 | 32.13087439 | 32.02380781 | 31.67953781 | 31.71662732 | 31.68424315 | 31.68012196 |
|              |             | 1           | 2           | 3           | 4           | 8           | 5           | 6           | 7           |

|                     |                     |             |             |             |             |             |             |             |             |             |
|---------------------|---------------------|-------------|-------------|-------------|-------------|-------------|-------------|-------------|-------------|-------------|
|                     | <b>9</b>            | 33.85528237 | 33.46242714 | 32.28842601 | 32.30186273 | 31.61464481 | 31.65499951 | 31.62294365 | 31.62630447 |             |
|                     |                     | 1           | 2           | 4           | 3           | 8           | 5           | 7           | 6           |             |
|                     | <b>11</b>           | 34.32640309 | 33.95503259 | 32.45447322 | 32.68516208 | 31.56905771 | 31.6086748  | 31.58247022 | 31.60308941 |             |
|                     |                     | 1           | 2           | 4           | 3           | 8           | 5           | 7           | 6           |             |
|                     | <b>15</b>           | 35.22559143 | 34.81997955 | 33.05589827 | 33.50240429 | 31.54464166 | 31.56884575 | 31.54444329 | 31.60860477 |             |
|                     |                     | 1           | 2           | 4           | 3           | 7           | 6           | 8           | 5           |             |
|                     | <b>20</b>           | 37.18183118 | 36.73897535 | 34.38044803 | 35.51011134 | 31.62024035 | 31.65122673 | 31.65750046 | 31.82353707 |             |
|                     |                     | 1           | 2           | 4           | 3           | 8           | 7           | 6           | 5           |             |
|                     | <b>Average rank</b> | 1.25        | 1.75        | 3.625       | 3.625       | 7.25        | 5.125       | 6.75        | 6.625       |             |
|                     | <b>Overall rank</b> | 1           | 2           | 3           | 4           | 8           | 5           | 7           | 6           |             |
| <b>SSIM</b>         | <b>2</b>            | 0.854442051 | 0.854372117 | 0.85438397  | 0.854272532 | 0.854327479 | 0.854880924 | 0.854327479 | 0.854327479 |             |
|                     |                     | 2           | 4           | 3           | 8           | 5           | 1           | 6           | 7           |             |
|                     | <b>3</b>            | 0.852463369 | 0.852009819 | 0.851944867 | 0.851212882 | 0.85040902  | 0.851171706 | 0.850406681 | 0.850403286 |             |
|                     |                     | 1           | 2           | 3           | 4           | 6           | 5           | 7           | 8           |             |
|                     | <b>5</b>            | 0.856322198 | 0.86236882  | 0.851489478 | 0.848865797 | 0.844270628 | 0.845125244 | 0.844278474 | 0.844269669 |             |
|                     |                     | 2           | 1           | 3           | 4           | 7           | 5           | 6           | 8           |             |
|                     | <b>7</b>            | 0.87865291  | 0.867315641 | 0.853937333 | 0.850826961 | 0.841284283 | 0.842421388 | 0.841464422 | 0.841360639 |             |
|                     |                     | 1           | 2           | 3           | 4           | 8           | 5           | 6           | 7           |             |
|                     | <b>9</b>            | 0.893331392 | 0.885552903 | 0.858345717 | 0.860082478 | 0.839288629 | 0.840330982 | 0.839575838 | 0.839729442 |             |
|                     |                     | 1           | 2           | 4           | 3           | 8           | 5           | 7           | 6           |             |
|                     | <b>11</b>           | 0.900344454 | 0.894491615 | 0.863302768 | 0.870333911 | 0.837820241 | 0.838624882 | 0.838243111 | 0.838855198 |             |
|                     |                     | 1           | 2           | 4           | 3           | 8           | 6           | 7           | 5           |             |
|                     | <b>15</b>           | 0.912603487 | 0.906949924 | 0.87759859  | 0.884783485 | 0.83673609  | 0.837237236 | 0.836865674 | 0.838254639 |             |
|                     |                     | 1           | 2           | 4           | 3           | 8           | 6           | 7           | 5           |             |
|                     | <b>20</b>           | 0.927359454 | 0.924034708 | 0.898587623 | 0.911060728 | 0.838792408 | 0.839674305 | 0.839984642 | 0.844295113 |             |
|                     |                     | 1           | 2           | 4           | 3           | 8           | 7           | 6           | 5           |             |
|                     | <b>Average rank</b> | 1.25        | 2.125       | 3.5         | 4           | 7.25        | 5           | 6.5         | 6.375       |             |
|                     | <b>Overall rank</b> | 1           | 2           | 3           | 4           | 8           | 5           | 7           | 6           |             |
|                     | <b>FSIM</b>         | <b>2</b>    | 0.373888202 | 0.36748598  | 0.37102     | 0.36936394  | 0.369391913 | 0.37303241  | 0.369391913 | 0.369391913 |
|                     |                     |             | 1           | 8           | 3           | 7           | 4           | 2           | 5           | 6           |
| <b>3</b>            |                     | 0.404446513 | 0.400362225 | 0.422996121 | 0.405739601 | 0.402119624 | 0.392310612 | 0.402092986 | 0.402090185 |             |
|                     |                     | 3           | 7           | 1           | 2           | 4           | 8           | 5           | 6           |             |
| <b>5</b>            |                     | 0.51833911  | 0.468804562 | 0.435897143 | 0.426685361 | 0.405669347 | 0.402544716 | 0.406203218 | 0.40673829  |             |
|                     |                     | 1           | 2           | 3           | 4           | 7           | 8           | 6           | 5           |             |
| <b>7</b>            |                     | 0.61570014  | 0.557195114 | 0.436098967 | 0.418552465 | 0.40139682  | 0.397703096 | 0.403423311 | 0.402223872 |             |
|                     |                     | 1           | 2           | 3           | 4           | 7           | 8           | 5           | 6           |             |
| <b>9</b>            |                     | 0.665206828 | 0.625621157 | 0.474952997 | 0.511728992 | 0.394300339 | 0.384500908 | 0.398320085 | 0.399649917 |             |
|                     |                     | 1           | 2           | 4           | 3           | 7           | 8           | 6           | 5           |             |
| <b>11</b>           |                     | 0.676336454 | 0.661177534 | 0.526081881 | 0.586237676 | 0.382491429 | 0.360956946 | 0.390201286 | 0.389517372 |             |
|                     |                     | 1           | 2           | 4           | 3           | 7           | 8           | 5           | 6           |             |
| <b>15</b>           |                     | 0.703080952 | 0.694378787 | 0.618182466 | 0.632983059 | 0.369688793 | 0.363285724 | 0.382266401 | 0.368362727 |             |
|                     |                     | 1           | 2           | 4           | 3           | 6           | 8           | 5           | 7           |             |
| <b>20</b>           |                     | 0.69613299  | 0.691124462 | 0.676676401 | 0.656509205 | 0.370907375 | 0.380134008 | 0.393232035 | 0.412253427 |             |
|                     |                     | 1           | 2           | 3           | 4           | 8           | 7           | 6           | 5           |             |
| <b>Average rank</b> |                     | 1.25        | 3.375       | 3.125       | 3.75        | 6.25        | 7.125       | 5.375       | 5.75        |             |

|  |              |   |   |   |   |   |   |   |   |
|--|--------------|---|---|---|---|---|---|---|---|
|  | Overall rank | 1 | 3 | 2 | 4 | 7 | 8 | 5 | 6 |
|--|--------------|---|---|---|---|---|---|---|---|

**Table S4.** The comparison of statistical results of the values of performance evaluation metrics for all algorithms on test image ‘img4’.

| Metric       | numTh | LSPIPSO     | PSO         | BFO         | GBMO        | EMA         | MWOA        | HWOA        | CSO         |
|--------------|-------|-------------|-------------|-------------|-------------|-------------|-------------|-------------|-------------|
| RMSE         | 2     | 0.016584347 | 0.016397383 | 0.016397341 | 0.016397948 | 0.01639732  | 0.017494026 | 0.01639732  | 0.01639732  |
|              |       | 7           | 5           | 4           | 6           | 1           | 8           | 2           | 3           |
|              | 3     | 0.018218925 | 0.018218076 | 0.018178257 | 0.01821555  | 0.018178297 | 0.018954458 | 0.018178302 | 0.018178297 |
|              |       | 7           | 6           | 1           | 5           | 2           | 8           | 4           | 3           |
|              | 5     | 0.022067897 | 0.022032662 | 0.021969793 | 0.022028921 | 0.02203456  | 0.022215404 | 0.022034582 | 0.022034602 |
|              |       | 7           | 3           | 1           | 2           | 4           | 8           | 5           | 6           |
|              | 7     | 0.022965071 | 0.023605164 | 0.023741951 | 0.02362929  | 0.023714056 | 0.023774619 | 0.023714055 | 0.023714219 |
|              |       | 1           | 2           | 7           | 3           | 5           | 8           | 4           | 6           |
|              | 9     | 0.023880256 | 0.023354485 | 0.024947134 | 0.024558975 | 0.024899837 | 0.024945816 | 0.024900229 | 0.024900392 |
|              |       | 2           | 1           | 8           | 3           | 4           | 7           | 5           | 6           |
|              | 11    | 0.022236203 | 0.021969475 | 0.025827849 | 0.025061138 | 0.025818705 | 0.025818057 | 0.025816049 | 0.025824506 |
|              |       | 2           | 1           | 8           | 3           | 6           | 5           | 4           | 7           |
|              | 15    | 0.020430789 | 0.019967941 | 0.02712576  | 0.022358457 | 0.027104003 | 0.027048528 | 0.02708255  | 0.027083053 |
|              |       | 2           | 1           | 8           | 3           | 7           | 4           | 5           | 6           |
|              | 20    | 0.017795296 | 0.017819681 | 0.025638307 | 0.019846374 | 0.025626918 | 0.025547794 | 0.025554731 | 0.025532782 |
| 1            |       | 2           | 8           | 3           | 7           | 5           | 6           | 4           |             |
| Average rank |       | 3.625       | 2.625       | 5.625       | 3.5         | 4.5         | 6.625       | 4.375       | 5.125       |
| Overall rank |       | 3           | 1           | 7           | 2           | 5           | 8           | 4           | 6           |
| PSNR         | 2     | 35.4921558  | 35.58461497 | 35.58463745 | 35.5843431  | 35.58464704 | 35.0263139  | 35.58464704 | 35.58464704 |
|              |       | 7           | 5           | 4           | 6           | 1           | 8           | 2           | 3           |
|              | 3     | 34.59321331 | 34.5974419  | 34.60882117 | 34.61079457 | 34.60878763 | 34.28559308 | 34.6087845  | 34.60878763 |
|              |       | 7           | 6           | 2           | 1           | 3           | 8           | 5           | 4           |
|              | 5     | 32.96690999 | 32.98464823 | 32.99955915 | 32.99905911 | 32.97711953 | 32.91753778 | 32.97711286 | 32.97710436 |
|              |       | 7           | 3           | 1           | 2           | 4           | 8           | 5           | 6           |
|              | 7     | 32.6242741  | 32.40418998 | 32.35017994 | 32.4002241  | 32.35838537 | 32.34545976 | 32.35838118 | 32.35832471 |
|              |       | 1           | 2           | 7           | 3           | 4           | 8           | 5           | 6           |
|              | 9     | 32.33063374 | 32.50691892 | 31.93388318 | 32.07454418 | 31.94764942 | 31.93680482 | 31.94751943 | 31.94747511 |
|              |       | 2           | 1           | 8           | 3           | 4           | 7           | 5           | 6           |
|              | 11    | 32.94478328 | 33.04602411 | 31.6361891  | 31.89520545 | 31.64161609 | 31.64476309 | 31.64226303 | 31.6399523  |
|              |       | 2           | 1           | 8           | 3           | 6           | 4           | 5           | 7           |
|              | 15    | 33.67405936 | 33.86019282 | 31.22769609 | 32.89456107 | 31.23298893 | 31.25181635 | 31.23837044 | 31.23855669 |
|              |       | 2           | 1           | 8           | 3           | 7           | 4           | 6           | 5           |
|              | 20    | 34.78315923 | 34.7482     | 31.71943409 | 33.86457957 | 31.7108682  | 31.7359005  | 31.72970824 | 31.73941411 |
| 1            |       | 2           | 7           | 3           | 8           | 5           | 6           | 4           |             |
| Average rank |       | 3.625       | 2.625       | 5.625       | 3           | 4.625       | 6.5         | 4.875       | 5.125       |
| Overall rank |       | 3           | 1           | 7           | 2           | 4           | 8           | 5           | 6           |
| SSIM         | 2     | 0.892979643 | 0.893605537 | 0.893606736 | 0.893587392 | 0.893607388 | 0.876399411 | 0.893607388 | 0.893607388 |
|              |       | 7           | 5           | 4           | 6           | 1           | 8           | 2           | 3           |
|              | 3     | 0.892239064 | 0.892309521 | 0.892635021 | 0.892537679 | 0.892649876 | 0.882977729 | 0.892649749 | 0.892649876 |



|      |              |              |             |             |             |             |             |             |             |       |
|------|--------------|--------------|-------------|-------------|-------------|-------------|-------------|-------------|-------------|-------|
|      |              | 7            | 6           | 4           | 5           | 1           | 8           | 3           | 2           |       |
| 5    |              | 0.867865871  | 0.869142525 | 0.870163369 | 0.869528499 | 0.869864653 | 0.867932484 | 0.869864234 | 0.86986438  |       |
|      |              | 8            | 6           | 1           | 5           | 2           | 7           | 4           | 3           |       |
| 7    |              | 0.860021738  | 0.856354553 | 0.85832401  | 0.857620414 | 0.858787913 | 0.858231918 | 0.858787918 | 0.858788324 |       |
|      |              | 1            | 8           | 5           | 7           | 4           | 6           | 3           | 2           |       |
| 9    |              | 0.851710752  | 0.851999082 | 0.849882469 | 0.848355016 | 0.85068243  | 0.850302433 | 0.850680494 | 0.850687281 |       |
|      |              | 2            | 1           | 7           | 8           | 4           | 6           | 5           | 3           |       |
| 11   |              | 0.856975284  | 0.859403074 | 0.843413674 | 0.841939665 | 0.844226562 | 0.844177627 | 0.844240501 | 0.844204611 |       |
|      |              | 2            | 1           | 7           | 8           | 4           | 6           | 3           | 5           |       |
| 15   |              | 0.860785784  | 0.861794193 | 0.834112048 | 0.853388369 | 0.834967093 | 0.835345948 | 0.83513996  | 0.835056391 |       |
|      |              | 2            | 1           | 8           | 3           | 7           | 4           | 5           | 6           |       |
| 20   |              | 0.854305731  | 0.854851926 | 0.843149064 | 0.851856567 | 0.844942865 | 0.845608687 | 0.845789302 | 0.844754254 |       |
|      |              | 2            | 1           | 8           | 3           | 6           | 5           | 4           | 7           |       |
|      | Average rank | 3.875        | 3.625       | 5.5         | 5.625       | 3.625       | 6.25        | 3.625       | 3.875       |       |
|      | Overall rank | 4            | 1           | 6           | 7           | 2           | 8           | 3           | 5           |       |
| FSIM | 2            | 0.333980574  | 0.334489728 | 0.334465998 | 0.334700093 | 0.334434945 | 0.35166029  | 0.334434945 | 0.334434945 |       |
|      |              | 8            | 3           | 4           | 2           | 5           | 1           | 6           | 7           |       |
|      | 3            | 0.375281291  | 0.375034979 | 0.373073723 | 0.374175565 | 0.37238103  | 0.404360222 | 0.37238335  | 0.37238103  |       |
|      |              | 2            | 3           | 5           | 4           | 7           | 1           | 6           | 8           |       |
|      | 5            | 0.400424131  | 0.400285748 | 0.381354957 | 0.394405008 | 0.374212531 | 0.390126862 | 0.374198943 | 0.374165563 |       |
|      |              | 1            | 2           | 5           | 3           | 6           | 4           | 7           | 8           |       |
|      | 7            | 0.432935258  | 0.439218328 | 0.390175708 | 0.421332294 | 0.376438232 | 0.387864799 | 0.376329172 | 0.376117837 |       |
|      |              | 2            | 1           | 4           | 3           | 6           | 5           | 7           | 8           |       |
|      | 9            | 0.456052497  | 0.450314502 | 0.404448973 | 0.446623528 | 0.382584032 | 0.397364034 | 0.382074327 | 0.381309263 |       |
|      |              | 1            | 2           | 4           | 3           | 6           | 5           | 7           | 8           |       |
|      | 11           | 0.451396602  | 0.457061443 | 0.416310744 | 0.435967097 | 0.388057787 | 0.407463436 | 0.387059501 | 0.385601615 |       |
|      |              | 2            | 1           | 4           | 3           | 6           | 5           | 7           | 8           |       |
|      | 15           | 0.436752045  | 0.435673224 | 0.434335955 | 0.429208369 | 0.403627148 | 0.425482394 | 0.398150712 | 0.404221705 |       |
|      |              | 1            | 2           | 3           | 4           | 7           | 5           | 8           | 6           |       |
|      | 20           | 0.38557868   | 0.382625993 | 0.425242795 | 0.378555876 | 0.411398707 | 0.419980713 | 0.395759882 | 0.422151713 |       |
|      |              | 6            | 7           | 1           | 8           | 4           | 3           | 5           | 2           |       |
|      |              | Average rank | 2.875       | 2.625       | 3.75        | 3.75        | 5.875       | 3.625       | 6.625       | 6.875 |
|      |              | Overall rank | 2           | 1           | 4           | 5           | 6           | 3           | 7           | 8     |

**Table S5.** The comparison of statistical results of the values of performance evaluation metrics for all algorithms on test image ‘img5’.

| Metric | numTh       | LSPIPSO     | PSO         | BFO         | GBMO        | EMA         | MWOA        | HWOA        | CSO         |
|--------|-------------|-------------|-------------|-------------|-------------|-------------|-------------|-------------|-------------|
| RMSE   | 2           | 0.024017024 | 0.024192159 | 0.024018056 | 0.023993582 | 0.024017571 | 0.028817885 | 0.024017571 | 0.024017571 |
|        |             | 2           | 7           | 6           | 1           | 3           | 8           | 4           | 5           |
|        | 3           | 0.025559141 | 0.024940948 | 0.025026688 | 0.024952236 | 0.025179654 | 0.027254527 | 0.025179638 | 0.025179684 |
|        |             | 7           | 1           | 3           | 2           | 5           | 8           | 4           | 6           |
|        | 5           | 0.02813244  | 0.027550898 | 0.026708413 | 0.027697768 | 0.027140678 | 0.027096566 | 0.027140553 | 0.027140786 |
|        |             | 8           | 6           | 1           | 7           | 4           | 2           | 3           | 5           |
| 7      | 0.026149235 | 0.028613604 | 0.027837354 | 0.029028254 | 0.028007522 | 0.027893752 | 0.027997158 | 0.027998475 |             |

|      |              |             |             |             |             |             |             |             |             |             |
|------|--------------|-------------|-------------|-------------|-------------|-------------|-------------|-------------|-------------|-------------|
|      |              | 1           | 7           | 2           | 8           | 6           | 3           | 4           | 5           |             |
|      | 9            | 0.026860867 | 0.027738167 | 0.029063399 | 0.029868698 | 0.028644987 | 0.028655889 | 0.028604516 | 0.028605005 |             |
|      |              | 1           | 2           | 7           | 8           | 5           | 6           | 3           | 4           |             |
|      | 11           | 0.026703319 | 0.026844257 | 0.029674574 | 0.029095057 | 0.029240383 | 0.029252504 | 0.029076083 | 0.029055445 |             |
|      |              | 1           | 2           | 8           | 5           | 6           | 7           | 4           | 3           |             |
|      | 15           | 0.025165562 | 0.026200626 | 0.030424112 | 0.0281598   | 0.030152895 | 0.030053556 | 0.029723875 | 0.029675943 |             |
|      |              | 1           | 2           | 8           | 3           | 7           | 6           | 5           | 4           |             |
|      | 20           | 0.019868086 | 0.020927742 | 0.030120304 | 0.022762017 | 0.029716182 | 0.029634473 | 0.029520594 | 0.029114824 |             |
|      |              | 1           | 2           | 8           | 3           | 7           | 6           | 5           | 4           |             |
|      | Average rank | 2.75        | 3.625       | 5.375       | 4.625       | 5.375       | 5.75        | 4           | 4.5         |             |
|      | Overall rank | 1           | 2           | 6           | 5           | 7           | 8           | 3           | 4           |             |
| PSNR | 2            | 32.23977605 | 32.18375228 | 32.23936174 | 32.24707105 | 32.23957696 | 30.76301622 | 32.23957696 | 32.23957696 |             |
|      |              | 2           | 7           | 6           | 1           | 3           | 8           | 4           | 5           |             |
|      | 3            | 31.7696711  | 31.9435461  | 31.94340382 | 31.94954074 | 31.88301315 | 31.24293612 | 31.88301766 | 31.88300447 |             |
|      |              | 7           | 2           | 3           | 1           | 5           | 8           | 4           | 6           |             |
|      | 5            | 30.99182606 | 31.17311091 | 31.43990746 | 31.1212564  | 31.29071634 | 31.30305752 | 31.2907533  | 31.29067885 |             |
|      |              | 8           | 6           | 1           | 7           | 4           | 2           | 3           | 5           |             |
|      | 7            | 31.57967057 | 30.85900983 | 31.08526028 | 30.73698065 | 31.03317329 | 31.06532783 | 31.03612961 | 31.03573644 |             |
|      |              | 1           | 7           | 2           | 8           | 6           | 3           | 4           | 5           |             |
|      | 9            | 31.40184982 | 31.09182881 | 30.72811753 | 30.48716791 | 30.84521363 | 30.84256637 | 30.85715176 | 30.85700903 |             |
|      |              | 1           | 2           | 7           | 8           | 5           | 6           | 3           | 4           |             |
|      | 11           | 31.45929364 | 31.39898707 | 30.54524321 | 30.70974401 | 30.6723397  | 30.66951172 | 30.71929313 | 30.72523929 |             |
|      |              | 1           | 2           | 8           | 5           | 6           | 7           | 4           | 3           |             |
|      | 15           | 31.96422006 | 31.62382333 | 30.33310881 | 30.9982552  | 30.41090438 | 30.43886793 | 30.53159781 | 30.54543942 |             |
|      |              | 1           | 2           | 8           | 3           | 7           | 6           | 5           | 4           |             |
|      | 20           | 33.98152915 | 33.55995509 | 30.40590919 | 32.84431996 | 30.53646726 | 30.56003718 | 30.59234434 | 30.7080754  |             |
|      |              | 1           | 2           | 8           | 3           | 7           | 6           | 5           | 4           |             |
|      | Average rank | 2.75        | 3.75        | 5.375       | 4.5         | 5.375       | 5.75        | 4           | 4.5         |             |
|      | Overall rank | 1           | 2           | 6           | 4           | 7           | 8           | 3           | 5           |             |
|      | SSIM         | 2           | 0.797039102 | 0.797243095 | 0.797012439 | 0.797273234 | 0.797052529 | 0.801633136 | 0.797052529 | 0.797052529 |
|      |              |             | 7           | 3           | 8           | 2           | 4           | 1           | 5           | 6           |
| 3    |              | 0.819545578 | 0.823349679 | 0.82134338  | 0.822993657 | 0.820922268 | 0.814505755 | 0.820922501 | 0.820921936 |             |
|      |              | 7           | 1           | 3           | 2           | 5           | 8           | 4           | 6           |             |
| 5    |              | 0.818813189 | 0.822527179 | 0.826640142 | 0.82175105  | 0.824267181 | 0.824702507 | 0.824268403 | 0.824266649 |             |
|      |              | 8           | 6           | 1           | 7           | 4           | 2           | 3           | 5           |             |
| 7    |              | 0.834408688 | 0.818053203 | 0.823342182 | 0.815183658 | 0.821750787 | 0.82274473  | 0.8218301   | 0.821822002 |             |
|      |              | 1           | 7           | 2           | 8           | 6           | 3           | 4           | 5           |             |
| 9    |              | 0.832414576 | 0.825449896 | 0.815928389 | 0.810206001 | 0.818879158 | 0.818917258 | 0.819118174 | 0.819118586 |             |
|      |              | 1           | 2           | 7           | 8           | 6           | 5           | 4           | 3           |             |
| 11   |              | 0.834167388 | 0.833147488 | 0.811974767 | 0.816389013 | 0.815326886 | 0.815320072 | 0.81652441  | 0.816698269 |             |
|      |              | 1           | 2           | 8           | 5           | 6           | 7           | 4           | 3           |             |
| 15   |              | 0.84510023  | 0.837613448 | 0.806744541 | 0.823266862 | 0.808982714 | 0.809823627 | 0.812339392 | 0.812724713 |             |
|      |              | 1           | 2           | 8           | 3           | 7           | 6           | 5           | 4           |             |
| 20   |              | 0.875332835 | 0.870784342 | 0.80832089  | 0.862367651 | 0.811647143 | 0.812323709 | 0.813089217 | 0.816061544 |             |
|      |              | 1           | 2           | 8           | 3           | 7           | 6           | 5           | 4           |             |

|             | Average rank | 3.375        | 3.125       | 5.625       | 4.75        | 5.625       | 4.75        | 4.25        | 4.5         |      |
|-------------|--------------|--------------|-------------|-------------|-------------|-------------|-------------|-------------|-------------|------|
|             | Overall rank | 2            | 1           | 7           | 5           | 8           | 6           | 3           | 4           |      |
| <b>FSIM</b> | <b>2</b>     | 0.347662582  | 0.34741057  | 0.347910722 | 0.347788255 | 0.344993661 | 0.340971792 | 0.344993661 | 0.344993661 |      |
|             |              | 3            | 4           | 1           | 2           | 5           | 8           | 6           | 7           |      |
|             | <b>3</b>     | 0.418389304  | 0.41941849  | 0.410379507 | 0.416640213 | 0.403967035 | 0.403528649 | 0.403987477 | 0.403945289 |      |
|             |              | 2            | 1           | 4           | 3           | 6           | 8           | 5           | 7           |      |
|             | <b>5</b>     | 0.435439337  | 0.440735833 | 0.43853009  | 0.430073862 | 0.407548893 | 0.43504554  | 0.407701475 | 0.407526737 |      |
|             |              | 3            | 1           | 2           | 5           | 7           | 4           | 6           | 8           |      |
|             | <b>7</b>     | 0.529157307  | 0.46685762  | 0.444437475 | 0.43277806  | 0.41497344  | 0.440674951 | 0.414549707 | 0.412595492 |      |
|             |              | 1            | 2           | 3           | 5           | 6           | 4           | 7           | 8           |      |
|             | <b>9</b>     | 0.578898121  | 0.508986117 | 0.451569837 | 0.41285632  | 0.421237779 | 0.446816109 | 0.418725152 | 0.419211186 |      |
|             |              | 1            | 2           | 3           | 8           | 5           | 4           | 7           | 6           |      |
|             | <b>11</b>    | 0.557781891  | 0.563883779 | 0.446581685 | 0.47956586  | 0.418513865 | 0.441456196 | 0.419340142 | 0.424580452 |      |
|             |              | 2            | 1           | 4           | 3           | 8           | 5           | 7           | 6           |      |
|             | <b>15</b>    | 0.617245771  | 0.601804042 | 0.416572863 | 0.522343945 | 0.402633358 | 0.432335475 | 0.42177621  | 0.444610891 |      |
|             |              | 1            | 2           | 7           | 3           | 8           | 5           | 6           | 4           |      |
|             | <b>20</b>    | 0.594624261  | 0.600100765 | 0.385256448 | 0.519595716 | 0.411768904 | 0.4186169   | 0.406353228 | 0.449105243 |      |
|             |              | 2            | 1           | 8           | 3           | 6           | 5           | 7           | 4           |      |
|             |              | Average rank | 1.875       | 1.75        | 4           | 4           | 6.375       | 5.375       | 6.375       | 6.25 |
|             |              | Overall rank | 2           | 1           | 3           | 4           | 7           | 5           | 8           | 6    |

**Table S6.** The comparison of statistical results of the values of performance evaluation metrics for all algorithms on test image ‘img6’.

| Metric      | numTh       | LSPIPSO      | PSO         | BFO         | GBMO        | EMA         | MWOA        | HWOA        | CSO         |             |
|-------------|-------------|--------------|-------------|-------------|-------------|-------------|-------------|-------------|-------------|-------------|
| <b>RMSE</b> | <b>2</b>    | 0.025460913  | 0.025467803 | 0.02530241  | 0.025460913 | 0.025309881 | 0.026948939 | 0.025309881 | 0.025309881 |             |
|             |             | 5            | 7           | 1           | 6           | 2           | 8           | 3           | 4           |             |
|             | <b>3</b>    | 0.022425932  | 0.022274877 | 0.022633731 | 0.022425932 | 0.022575117 | 0.024993355 | 0.022575342 | 0.022509536 |             |
|             |             | 2            | 1           | 7           | 3           | 5           | 8           | 6           | 4           |             |
|             | <b>5</b>    | 0.020144937  | 0.020665149 | 0.022084671 | 0.020144937 | 0.020868991 | 0.024511566 | 0.020549421 | 0.020555524 |             |
|             |             | 1            | 5           | 7           | 2           | 6           | 8           | 3           | 4           |             |
|             | <b>7</b>    | 0.018776438  | 0.018841398 | 0.020471139 | 0.018776438 | 0.019619113 | 0.022982808 | 0.018680985 | 0.018486174 |             |
|             |             | 3            | 5           | 7           | 4           | 6           | 8           | 2           | 1           |             |
|             | <b>9</b>    | 0.017373033  | 0.018178494 | 0.019948371 | 0.017373033 | 0.018585747 | 0.023239166 | 0.018157672 | 0.017793894 |             |
|             |             | 1            | 5           | 7           | 2           | 6           | 8           | 4           | 3           |             |
|             | <b>11</b>   | 0.017407984  | 0.01837524  | 0.019983658 | 0.017407984 | 0.018523107 | 0.022147445 | 0.018237596 | 0.017677619 |             |
|             |             | 1            | 5           | 7           | 2           | 6           | 8           | 4           | 3           |             |
|             | <b>15</b>   | 0.017150065  | 0.018104973 | 0.020309723 | 0.017150065 | 0.018210084 | 0.022772966 | 0.018835165 | 0.018023028 |             |
|             |             | 1            | 4           | 7           | 2           | 5           | 8           | 6           | 3           |             |
|             | <b>20</b>   | 0.016749279  | 0.017133654 | 0.019091373 | 0.016749279 | 0.016859062 | 0.020880869 | 0.01788813  | 0.017182503 |             |
|             |             | 1            | 4           | 7           | 2           | 3           | 8           | 6           | 5           |             |
|             |             | Average rank | 1.875       | 4.5         | 6.25        | 2.875       | 4.875       | 8           | 4.25        | 3.375       |
|             |             | Overall rank | 1           | 5           | 7           | 2           | 6           | 8           | 4           | 3           |
|             | <b>PSNR</b> | <b>2</b>     | 31.88102756 | 31.87701021 | 31.92834991 | 31.88102756 | 31.93322068 | 31.38459969 | 31.93322068 | 31.93322068 |
|             |             |              | 5           | 7           | 4           | 6           | 1           | 8           | 2           | 3           |

|              |             |             |             |             |             |             |             |             |             |
|--------------|-------------|-------------|-------------|-------------|-------------|-------------|-------------|-------------|-------------|
|              | 3           | 32.98543194 | 33.01916447 | 32.87680125 | 32.98543194 | 32.92498167 | 32.04147795 | 32.92488931 | 32.94969382 |
|              |             | 2           | 1           | 7           | 3           | 5           | 8           | 6           | 4           |
|              | 5           | 33.89480683 | 33.65778093 | 33.09606393 | 33.89480683 | 33.608816   | 32.20961211 | 33.74324679 | 33.7405761  |
|              |             | 1           | 5           | 7           | 2           | 6           | 8           | 3           | 4           |
|              | 7           | 34.48498264 | 34.46673586 | 33.7261272  | 34.48498264 | 34.14505984 | 32.73671813 | 34.57033117 | 34.66133024 |
|              |             | 3           | 5           | 7           | 4           | 6           | 8           | 2           | 1           |
|              | 9           | 35.17393222 | 34.78087689 | 33.96898486 | 35.17393222 | 34.61093046 | 32.63176129 | 34.81795996 | 34.9898916  |
|              |             | 1           | 5           | 7           | 2           | 6           | 8           | 4           | 3           |
|              | 11          | 35.16162319 | 34.68460378 | 33.97033221 | 35.16162319 | 34.64165745 | 33.06995951 | 34.77913865 | 35.05063851 |
|              |             | 1           | 5           | 7           | 2           | 6           | 8           | 4           | 3           |
|              | 15          | 35.315984   | 34.83395056 | 33.82936153 | 35.315984   | 34.78398358 | 32.83828051 | 34.49913626 | 34.8819562  |
|              |             | 1           | 4           | 7           | 2           | 5           | 8           | 6           | 3           |
|              | 20          | 35.49787962 | 35.30377865 | 34.37561172 | 35.49787962 | 35.46307418 | 33.59365016 | 34.94655097 | 35.29426492 |
|              |             | 1           | 4           | 7           | 2           | 3           | 8           | 6           | 5           |
| Average rank | 1.875       | 4.5         | 6.625       | 2.875       | 4.75        | 8           | 4.125       | 3.25        |             |
| Overall rank | 1           | 5           | 7           | 2           | 6           | 8           | 4           | 3           |             |
| SSIM         | 2           | 0.79277931  | 0.79300586  | 0.794192311 | 0.79277931  | 0.793177662 | 0.790689459 | 0.793177662 | 0.793177662 |
|              |             | 6           | 5           | 1           | 7           | 2           | 8           | 3           | 4           |
|              | 3           | 0.833640267 | 0.835601788 | 0.831758398 | 0.833640267 | 0.832455307 | 0.81526813  | 0.832458578 | 0.832880616 |
|              |             | 2           | 1           | 7           | 3           | 6           | 8           | 5           | 4           |
|              | 5           | 0.860895799 | 0.857838002 | 0.84832527  | 0.860895799 | 0.857369222 | 0.832857188 | 0.859089511 | 0.858699977 |
|              |             | 1           | 5           | 7           | 2           | 6           | 8           | 3           | 4           |
|              | 7           | 0.872376703 | 0.871301047 | 0.859429718 | 0.872376703 | 0.867612034 | 0.844447134 | 0.872778208 | 0.872787429 |
|              |             | 3           | 5           | 7           | 4           | 6           | 8           | 2           | 1           |
|              | 9           | 0.879459486 | 0.874909921 | 0.863149466 | 0.879459486 | 0.872091714 | 0.842753017 | 0.873610444 | 0.875286702 |
|              |             | 1           | 4           | 7           | 2           | 6           | 8           | 5           | 3           |
|              | 11          | 0.876936393 | 0.871545679 | 0.861456634 | 0.876936393 | 0.870661124 | 0.849497006 | 0.870272394 | 0.872285685 |
|              |             | 1           | 4           | 7           | 2           | 5           | 8           | 6           | 3           |
|              | 15          | 0.868639504 | 0.867770648 | 0.854282881 | 0.868639504 | 0.866190665 | 0.841633193 | 0.859504605 | 0.86362641  |
|              |             | 1           | 3           | 7           | 2           | 4           | 8           | 6           | 5           |
| 20           | 0.857420208 | 0.858288693 | 0.849320919 | 0.857420208 | 0.860744829 | 0.845935033 | 0.848674601 | 0.852796487 |             |
|              | 3           | 2           | 6           | 4           | 1           | 8           | 7           | 5           |             |
| Average rank | 2.25        | 3.625       | 6.125       | 3.25        | 4.5         | 8           | 4.625       | 3.625       |             |
| Overall rank | 1           | 3           | 7           | 2           | 5           | 8           | 6           | 4           |             |
| FSIM         | 2           | 0.594637668 | 0.595900398 | 0.596980098 | 0.593119308 | 0.591282606 | 0.626108918 | 0.591282606 | 0.591282606 |
|              |             | 4           | 3           | 2           | 5           | 6           | 1           | 7           | 8           |
|              | 3           | 0.661241177 | 0.663211903 | 0.662197658 | 0.657939774 | 0.656861758 | 0.666381827 | 0.65689989  | 0.656909463 |
|              |             | 4           | 2           | 3           | 5           | 8           | 1           | 7           | 6           |
|              | 5           | 0.722467098 | 0.714961079 | 0.709936696 | 0.714906994 | 0.71097196  | 0.739631999 | 0.709020376 | 0.707784751 |
|              |             | 2           | 3           | 6           | 4           | 5           | 1           | 7           | 8           |
|              | 7           | 0.739377898 | 0.730697653 | 0.726718    | 0.734814966 | 0.728721136 | 0.754712537 | 0.72223883  | 0.719469604 |
|              |             | 2           | 4           | 6           | 3           | 5           | 1           | 7           | 8           |
|              | 9           | 0.760020587 | 0.749869394 | 0.740903571 | 0.753008896 | 0.738826576 | 0.787021527 | 0.731827867 | 0.733089918 |
|              |             | 2           | 4           | 5           | 3           | 6           | 1           | 8           | 7           |
|              | 11          | 0.760033575 | 0.761074555 | 0.765984985 | 0.759663409 | 0.759347352 | 0.786145797 | 0.745571327 | 0.739447275 |

|  |              |             |             |             |             |             |             |             |             |
|--|--------------|-------------|-------------|-------------|-------------|-------------|-------------|-------------|-------------|
|  |              | 4           | 3           | 2           | 5           | 6           | 1           | 7           | 8           |
|  | 15           | 0.768182898 | 0.771595457 | 0.775320452 | 0.757686025 | 0.771669382 | 0.793510732 | 0.757930458 | 0.75418835  |
|  |              | 5           | 4           | 2           | 7           | 3           | 1           | 6           | 8           |
|  | 20           | 0.776631942 | 0.766637647 | 0.772888875 | 0.761285082 | 0.782813579 | 0.803360122 | 0.755708724 | 0.755486885 |
|  |              | 3           | 5           | 4           | 6           | 2           | 1           | 7           | 8           |
|  | Average rank | 3.25        | 3.5         | 3.75        | 4.75        | 5.125       | 1           | 7           | 7.625       |
|  | Overall rank | 2           | 3           | 4           | 5           | 6           | 1           | 7           | 8           |

**Table S7.** The comparison of statistical results of the values of performance evaluation metrics for all algorithms on test image ‘img7’.

| Metric | numTh        | LSPIPSO     | PSO         | BFO         | GBMO        | EMA         | MWOA        | HWOA        | CSO         |
|--------|--------------|-------------|-------------|-------------|-------------|-------------|-------------|-------------|-------------|
| RMSE   | 2            | 0.020290265 | 0.020326445 | 0.020033807 | 0.019987266 | 0.019840328 | 0.021891082 | 0.019840328 | 0.019840328 |
|        |              | 6           | 7           | 5           | 4           | 1           | 8           | 2           | 3           |
|        | 3            | 0.016359847 | 0.016764001 | 0.017192559 | 0.016497359 | 0.016258381 | 0.01941457  | 0.016219166 | 0.016228056 |
|        |              | 4           | 6           | 7           | 5           | 3           | 8           | 1           | 2           |
|        | 5            | 0.013608977 | 0.013835681 | 0.015832259 | 0.013819768 | 0.014150035 | 0.01786106  | 0.013717155 | 0.013572594 |
|        |              | 2           | 5           | 7           | 4           | 6           | 8           | 3           | 1           |
|        | 7            | 0.012098441 | 0.012557186 | 0.014412853 | 0.012867397 | 0.013486743 | 0.017366534 | 0.012874757 | 0.012572704 |
|        |              | 1           | 2           | 7           | 4           | 6           | 8           | 5           | 3           |
|        | 9            | 0.012008845 | 0.012205799 | 0.014361617 | 0.012646565 | 0.013071592 | 0.015593932 | 0.012900004 | 0.012479661 |
|        |              | 1           | 2           | 7           | 4           | 6           | 8           | 5           | 3           |
|        | 11           | 0.012341538 | 0.012206653 | 0.014379108 | 0.012453919 | 0.012659467 | 0.016865441 | 0.0131596   | 0.012459396 |
|        |              | 2           | 1           | 7           | 3           | 5           | 8           | 6           | 4           |
|        | 15           | 0.012886893 | 0.012729966 | 0.014958671 | 0.012760803 | 0.0128965   | 0.017301814 | 0.013977182 | 0.013000422 |
|        |              | 3           | 1           | 7           | 2           | 4           | 8           | 6           | 5           |
|        | 20           | 0.01252788  | 0.012637567 | 0.0142836   | 0.012431864 | 0.012301033 | 0.016164538 | 0.01383482  | 0.012847666 |
|        |              | 3           | 4           | 7           | 2           | 1           | 8           | 6           | 5           |
|        | Average rank | 2.75        | 3.5         | 6.75        | 3.5         | 4           | 8           | 4.25        | 3.25        |
|        | Overall rank | 1           | 3           | 7           | 4           | 5           | 8           | 6           | 2           |
| PSNR   | 2            | 33.84160257 | 33.81777336 | 33.95062714 | 33.97641121 | 34.04443664 | 33.17256782 | 34.04443664 | 34.04443664 |
|        |              | 6           | 7           | 5           | 4           | 1           | 8           | 2           | 3           |
|        | 3            | 35.65550433 | 35.48473552 | 35.25882297 | 35.63668386 | 35.76300683 | 34.19765954 | 35.78539182 | 35.78038823 |
|        |              | 4           | 6           | 7           | 5           | 3           | 8           | 1           | 2           |
|        | 5            | 37.20173408 | 37.05468891 | 35.97843695 | 37.13933391 | 36.95783844 | 34.87008699 | 37.23334832 | 37.3213053  |
|        |              | 3           | 5           | 7           | 4           | 6           | 8           | 2           | 1           |
|        | 7            | 38.22748821 | 37.91272711 | 36.7866228  | 37.75136702 | 37.36318051 | 35.1382495  | 37.78385424 | 37.99345783 |
|        |              | 1           | 3           | 7           | 5           | 6           | 8           | 4           | 2           |
|        | 9            | 38.34528067 | 38.23759362 | 36.78254581 | 37.90335318 | 37.64640852 | 36.08068893 | 37.76228626 | 38.05523054 |
|        |              | 1           | 2           | 7           | 4           | 6           | 8           | 5           | 3           |
|        | 11           | 38.11225069 | 38.2223901  | 36.80130198 | 38.06215427 | 37.92438824 | 35.40191559 | 37.59149714 | 38.06071341 |
|        |              | 2           | 1           | 7           | 3           | 5           | 8           | 6           | 4           |
|        | 15           | 37.77616422 | 37.87150633 | 36.47962686 | 37.84265205 | 37.75533415 | 35.1940739  | 37.06650448 | 37.6957091  |
|        |              | 3           | 1           | 7           | 2           | 4           | 8           | 6           | 5           |
|        | 20           | 38.02768436 | 37.94006733 | 36.87753024 | 38.07635638 | 38.18289071 | 35.80065433 | 37.16523602 | 37.80829416 |

|             |                     |                     |             |             |             |             |             |             |             |             |
|-------------|---------------------|---------------------|-------------|-------------|-------------|-------------|-------------|-------------|-------------|-------------|
|             |                     | 3                   | 4           | 7           | 2           | 1           | 8           | 6           | 5           |             |
|             | <b>Average rank</b> | 2.875               | 3.625       | 6.75        | 3.625       | 4           | 8           | 4           | 3.125       |             |
|             | <b>Overall rank</b> | 1                   | 3           | 7           | 4           | 5           | 8           | 6           | 2           |             |
| <b>SSIM</b> | <b>2</b>            | 0.830374539         | 0.830374539 | 0.830643458 | 0.830923338 | 0.831741964 | 0.822337408 | 0.831741964 | 0.831741964 |             |
|             |                     | 6                   | 7           | 5           | 4           | 1           | 8           | 2           | 3           |             |
|             | <b>3</b>            | 0.874701764         | 0.874701764 | 0.872995844 | 0.875331549 | 0.877310297 | 0.86368574  | 0.877496403 | 0.877352103 |             |
|             |                     | 5                   | 6           | 7           | 4           | 3           | 8           | 1           | 2           |             |
|             | <b>5</b>            | 0.906780405         | 0.906780405 | 0.893994455 | 0.906670164 | 0.903206171 | 0.88423613  | 0.904762024 | 0.904448371 |             |
|             |                     | 1                   | 2           | 7           | 3           | 6           | 8           | 4           | 5           |             |
|             | <b>7</b>            | 0.914909002         | 0.914909002 | 0.904519786 | 0.911842149 | 0.910695781 | 0.892828942 | 0.912621855 | 0.911699563 |             |
|             |                     | 1                   | 2           | 7           | 4           | 6           | 8           | 3           | 5           |             |
|             | <b>9</b>            | 0.915172466         | 0.915172466 | 0.908040824 | 0.909445294 | 0.912429286 | 0.901205763 | 0.911602517 | 0.910668419 |             |
|             |                     | 1                   | 2           | 7           | 6           | 3           | 8           | 4           | 5           |             |
|             | <b>11</b>           | 0.91308115          | 0.91308115  | 0.905445817 | 0.907776445 | 0.914009679 | 0.895338534 | 0.907061533 | 0.908836033 |             |
|             |                     | 2                   | 3           | 7           | 5           | 1           | 8           | 6           | 4           |             |
|             | <b>15</b>           | 0.908243647         | 0.908243647 | 0.898213166 | 0.90500703  | 0.90604198  | 0.889332406 | 0.895786167 | 0.89720128  |             |
|             |                     | 1                   | 2           | 5           | 4           | 3           | 8           | 7           | 6           |             |
|             | <b>20</b>           | 0.893605919         | 0.893605919 | 0.891068331 | 0.887606003 | 0.895557556 | 0.885338817 | 0.881512941 | 0.885096169 |             |
|             |                     | 2                   | 3           | 4           | 5           | 1           | 6           | 8           | 7           |             |
|             |                     | <b>Average rank</b> | 2.375       | 3.375       | 6.125       | 4.375       | 3           | 7.75        | 4.375       | 4.625       |
|             |                     | <b>Overall rank</b> | 1           | 3           | 7           | 4           | 2           | 8           | 5           | 6           |
|             | <b>FSIM</b>         | <b>2</b>            | 0.625781462 | 0.627598849 | 0.629166856 | 0.627266607 | 0.629283607 | 0.625781462 | 0.629283607 | 0.629283607 |
|             |                     |                     | 7           | 5           | 4           | 6           | 1           | 8           | 2           | 3           |
| <b>3</b>    |                     | 0.714702621         | 0.710397187 | 0.7103632   | 0.703559107 | 0.704482308 | 0.714702621 | 0.704563692 | 0.704313603 |             |
|             |                     | 1                   | 3           | 4           | 8           | 6           | 2           | 5           | 7           |             |
| <b>5</b>    |                     | 0.768384036         | 0.768648419 | 0.75431115  | 0.769500721 | 0.758522984 | 0.768384036 | 0.759702012 | 0.757993153 |             |
|             |                     | 3                   | 2           | 8           | 1           | 6           | 4           | 5           | 7           |             |
| <b>7</b>    |                     | 0.817390999         | 0.801355168 | 0.788565755 | 0.793618923 | 0.791827375 | 0.817390999 | 0.792645684 | 0.788679662 |             |
|             |                     | 1                   | 3           | 8           | 4           | 6           | 2           | 5           | 7           |             |
| <b>9</b>    |                     | 0.820128641         | 0.814272675 | 0.820167187 | 0.800065044 | 0.814218235 | 0.820128641 | 0.8076116   | 0.801815099 |             |
|             |                     | 2                   | 4           | 1           | 8           | 5           | 3           | 6           | 7           |             |
| <b>11</b>   |                     | 0.835427061         | 0.824311185 | 0.828666484 | 0.814336732 | 0.840373078 | 0.835427061 | 0.817889825 | 0.81718035  |             |
|             |                     | 2                   | 5           | 4           | 8           | 1           | 3           | 6           | 7           |             |
| <b>15</b>   |                     | 0.854312101         | 0.849423903 | 0.84605667  | 0.841535026 | 0.848737529 | 0.854312101 | 0.82810998  | 0.820835781 |             |
|             |                     | 1                   | 3           | 5           | 6           | 4           | 2           | 7           | 8           |             |
| <b>20</b>   |                     | 0.857858548         | 0.851113266 | 0.854247582 | 0.842242631 | 0.858178625 | 0.857858548 | 0.833333072 | 0.838560984 |             |
|             |                     | 2                   | 5           | 4           | 6           | 1           | 3           | 8           | 7           |             |
|             |                     | <b>Average rank</b> | 2.375       | 3.75        | 4.75        | 5.875       | 3.75        | 3.375       | 5.5         | 6.625       |
|             |                     | <b>Overall rank</b> | 1           | 3           | 5           | 7           | 4           | 2           | 6           | 8           |

**Table S8.** The comparison of statistical results of the values of performance evaluation metrics for all algorithms on test image ‘img8’.

| Metric      | numTh    | LSPIPSO     | PSO         | BFO         | GBMO        | EMA         | MWOA        | HWOA        | CSO         |
|-------------|----------|-------------|-------------|-------------|-------------|-------------|-------------|-------------|-------------|
| <b>RMSE</b> | <b>2</b> | 0.018696455 | 0.018683008 | 0.018750267 | 0.018679024 | 0.018696455 | 0.019688074 | 0.018696455 | 0.018696455 |

|      |              |              |             |             |             |             |             |             |             |   |
|------|--------------|--------------|-------------|-------------|-------------|-------------|-------------|-------------|-------------|---|
|      |              | 3            | 2           | 7           | 1           | 4           | 8           | 5           | 6           |   |
|      | 3            | 0.015668056  | 0.016057926 | 0.016254087 | 0.015799795 | 0.015667894 | 0.017638663 | 0.015668056 | 0.015667886 |   |
|      |              | 3            | 6           | 7           | 5           | 2           | 8           | 4           | 1           |   |
|      | 5            | 0.013280646  | 0.014169901 | 0.014347759 | 0.013580964 | 0.01355715  | 0.016702429 | 0.013280646 | 0.013263571 |   |
|      |              | 2            | 6           | 7           | 5           | 4           | 8           | 3           | 1           |   |
|      | 7            | 0.011891368  | 0.01319448  | 0.013176381 | 0.012104544 | 0.012584537 | 0.01674514  | 0.011891368 | 0.011907658 |   |
|      |              | 1            | 7           | 6           | 4           | 5           | 8           | 2           | 3           |   |
|      | 9            | 0.011488439  | 0.012163304 | 0.01321638  | 0.01188952  | 0.012381237 | 0.01682685  | 0.011488439 | 0.01153238  |   |
|      |              | 1            | 5           | 7           | 4           | 6           | 8           | 2           | 3           |   |
|      | 11           | 0.011173973  | 0.011722994 | 0.012920974 | 0.011525511 | 0.012367663 | 0.016847695 | 0.011173973 | 0.011436857 |   |
|      |              | 1            | 5           | 7           | 4           | 6           | 8           | 2           | 3           |   |
|      | 15           | 0.01160094   | 0.011999476 | 0.013282038 | 0.011510398 | 0.01221664  | 0.016464762 | 0.01160094  | 0.011582694 |   |
|      |              | 3            | 5           | 7           | 1           | 6           | 8           | 4           | 2           |   |
|      | 20           | 0.010735511  | 0.010910103 | 0.011493803 | 0.010365784 | 0.01068264  | 0.015174024 | 0.010735511 | 0.010783772 |   |
|      |              | 3            | 6           | 7           | 1           | 2           | 8           | 4           | 5           |   |
|      | Average rank | 2.125        | 5.25        | 6.875       | 3.125       | 4.375       | 8           | 3.25        | 3           |   |
|      | Overall rank | 1            | 6           | 7           | 3           | 5           | 8           | 4           | 2           |   |
| PSNR | 2            | 34.56268068  | 34.56874783 | 34.53687493 | 34.57015999 | 34.56268068 | 34.11032418 | 34.56268068 | 34.56268068 |   |
|      |              | 3            | 2           | 7           | 1           | 4           | 8           | 5           | 6           |   |
|      | 3            | 36.09663035  | 35.87587104 | 35.76566822 | 36.02063244 | 36.09671894 | 35.06082209 | 36.09663035 | 36.09672329 |   |
|      |              | 3            | 6           | 7           | 5           | 2           | 8           | 4           | 1           |   |
|      | 5            | 37.53222266  | 36.93942252 | 36.80418782 | 37.31748401 | 37.35277388 | 35.50906457 | 37.53222266 | 37.54257255 |   |
|      |              | 2            | 6           | 7           | 5           | 4           | 8           | 3           | 1           |   |
|      | 7            | 38.49257391  | 37.52684715 | 37.55642671 | 38.33301854 | 37.99909306 | 35.48089331 | 38.49257391 | 38.47905953 |   |
|      |              | 1            | 7           | 6           | 4           | 5           | 8           | 2           | 3           |   |
|      | 9            | 38.78940193  | 38.23576133 | 37.51972856 | 38.45590083 | 38.13793387 | 35.45503421 | 38.78940193 | 38.75219254 |   |
|      |              | 1            | 5           | 7           | 4           | 6           | 8           | 2           | 3           |   |
|      | 11           | 39.02942712  | 38.58087667 | 37.73061419 | 38.73412487 | 38.14682964 | 35.45035985 | 39.02942712 | 38.81983331 |   |
|      |              | 1            | 5           | 7           | 4           | 6           | 8           | 2           | 3           |   |
|      | 15           | 38.70552318  | 38.38471133 | 37.51309741 | 38.73536671 | 38.24746519 | 35.62446538 | 38.70552318 | 38.71580466 |   |
|      |              | 3            | 5           | 7           | 1           | 6           | 8           | 4           | 2           |   |
|      | 20           | 39.37892518  | 39.22824212 | 38.75689555 | 39.67346881 | 39.41935026 | 36.34455    | 39.37892518 | 39.33905598 |   |
|      |              | 3            | 6           | 7           | 1           | 2           | 8           | 4           | 5           |   |
|      |              | Average rank | 2.125       | 5.25        | 6.875       | 3.125       | 4.375       | 8           | 3.25        | 3 |
|      |              | Overall rank | 1           | 6           | 7           | 3           | 5           | 8           | 4           | 2 |
| SSIM | 2            | 0.895539208  | 0.895298919 | 0.895771776 | 0.895268149 | 0.895539208 | 0.900469673 | 0.895539208 | 0.895539208 |   |
|      |              | 3            | 7           | 2           | 8           | 4           | 1           | 5           | 6           |   |
|      | 3            | 0.913853089  | 0.913450701 | 0.913395834 | 0.913978834 | 0.913853089 | 0.909533786 | 0.913837947 | 0.913835774 |   |
|      |              | 2            | 6           | 7           | 1           | 3           | 8           | 4           | 5           |   |
|      | 5            | 0.93771029   | 0.934946714 | 0.933394157 | 0.937062522 | 0.93771029  | 0.924746047 | 0.938048753 | 0.937884739 |   |
|      |              | 3            | 6           | 7           | 5           | 4           | 8           | 1           | 2           |   |
|      | 7            | 0.944847529  | 0.940631326 | 0.939118723 | 0.943728058 | 0.944847529 | 0.928391046 | 0.945431242 | 0.944974936 |   |
|      |              | 3            | 6           | 7           | 5           | 4           | 8           | 1           | 2           |   |
|      | 9            | 0.94715817   | 0.946227162 | 0.942719194 | 0.946984521 | 0.94715817  | 0.927807233 | 0.947779018 | 0.947174626 |   |
|      |              | 3            | 6           | 7           | 5           | 4           | 8           | 1           | 2           |   |

|                     |                     |             |             |             |             |             |             |             |             |             |
|---------------------|---------------------|-------------|-------------|-------------|-------------|-------------|-------------|-------------|-------------|-------------|
|                     | <b>11</b>           | 0.94750569  | 0.94743763  | 0.941571292 | 0.94656075  | 0.94750569  | 0.929258058 | 0.947554893 | 0.94658141  |             |
|                     |                     | 2           | 4           | 7           | 6           | 3           | 8           | 1           | 5           |             |
|                     | <b>15</b>           | 0.945759883 | 0.945954266 | 0.942964705 | 0.945684524 | 0.945759883 | 0.930476387 | 0.943744339 | 0.943885446 |             |
|                     |                     | 2           | 1           | 7           | 4           | 3           | 8           | 6           | 5           |             |
|                     | <b>20</b>           | 0.943567086 | 0.941259002 | 0.941605175 | 0.937036407 | 0.943567086 | 0.93450436  | 0.937582809 | 0.93697181  |             |
|                     |                     | 1           | 4           | 3           | 6           | 2           | 8           | 5           | 7           |             |
|                     | <b>Average rank</b> | 2.375       | 5           | 5.875       | 5           | 3.375       | 7.125       | 3           | 4.25        |             |
|                     | <b>Overall rank</b> | 1           | 5           | 7           | 6           | 3           | 8           | 2           | 4           |             |
|                     | <b>FSIM</b>         | <b>2</b>    | 0.747321939 | 0.739950535 | 0.743518552 | 0.737665552 | 0.737458587 | 0.747321939 | 0.737458587 | 0.737458587 |
|                     |                     |             | 1           | 4           | 3           | 5           | 6           | 2           | 7           | 8           |
| <b>3</b>            |                     | 0.802113897 | 0.807146034 | 0.802363455 | 0.803056431 | 0.800596407 | 0.802113897 | 0.800496557 | 0.800490007 |             |
|                     |                     | 4           | 1           | 3           | 2           | 6           | 5           | 7           | 8           |             |
| <b>5</b>            |                     | 0.851736143 | 0.851029614 | 0.844979054 | 0.847713143 | 0.851525277 | 0.851736143 | 0.847094718 | 0.845552656 |             |
|                     |                     | 1           | 4           | 8           | 5           | 3           | 2           | 6           | 7           |             |
| <b>7</b>            |                     | 0.8876486   | 0.862687534 | 0.858042318 | 0.857006121 | 0.86529505  | 0.8876486   | 0.856045884 | 0.853147119 |             |
|                     |                     | 1           | 4           | 5           | 6           | 3           | 2           | 7           | 8           |             |
| <b>9</b>            |                     | 0.902549857 | 0.873714697 | 0.882080936 | 0.869753674 | 0.881415835 | 0.902549857 | 0.867830595 | 0.865594569 |             |
|                     |                     | 1           | 5           | 3           | 6           | 4           | 2           | 7           | 8           |             |
| <b>11</b>           |                     | 0.907277864 | 0.875633892 | 0.876158005 | 0.871533823 | 0.890365735 | 0.907277864 | 0.86802769  | 0.867742696 |             |
|                     |                     | 1           | 5           | 4           | 6           | 3           | 2           | 7           | 8           |             |
| <b>15</b>           |                     | 0.918095326 | 0.892997986 | 0.904171908 | 0.881528786 | 0.89394657  | 0.918095326 | 0.877551642 | 0.877288494 |             |
|                     |                     | 1           | 5           | 3           | 6           | 4           | 2           | 7           | 8           |             |
| <b>20</b>           |                     | 0.921508712 | 0.887427002 | 0.894191483 | 0.876107126 | 0.894449738 | 0.921508712 | 0.875697798 | 0.873562744 |             |
|                     |                     | 1           | 5           | 4           | 6           | 3           | 2           | 7           | 8           |             |
| <b>Average rank</b> |                     | 1.375       | 4.125       | 4.125       | 5.25        | 4           | 2.375       | 6.875       | 7.875       |             |
| <b>Overall rank</b> |                     | 1           | 4           | 5           | 6           | 3           | 2           | 7           | 8           |             |

**Table S9.** The comparison of statistical results of the values of performance evaluation metrics for all algorithms on test image ‘img9’.

| Metric      | numTh     | LSPIPSO     | PSO         | BFO         | GBMO        | EMA         | MWOA        | HWOA        | CSO         |
|-------------|-----------|-------------|-------------|-------------|-------------|-------------|-------------|-------------|-------------|
| <b>RMSE</b> | <b>2</b>  | 0.012523969 | 0.012580359 | 0.012565954 | 0.012489454 | 0.012523969 | 0.013603775 | 0.012523969 | 0.012523969 |
|             |           | 2           | 7           | 6           | 1           | 3           | 8           | 4           | 5           |
|             | <b>3</b>  | 0.010002386 | 0.010321093 | 0.010472632 | 0.009820622 | 0.010002386 | 0.011804513 | 0.010021189 | 0.010014366 |
|             |           | 2           | 6           | 7           | 1           | 3           | 8           | 5           | 4           |
|             | <b>5</b>  | 0.00778073  | 0.008401489 | 0.00900461  | 0.007852414 | 0.00778073  | 0.010199746 | 0.007757245 | 0.007786946 |
|             |           | 2           | 6           | 7           | 5           | 3           | 8           | 1           | 4           |
|             | <b>7</b>  | 0.006946232 | 0.007348825 | 0.008031248 | 0.007449366 | 0.006946232 | 0.009951484 | 0.006930657 | 0.00691602  |
|             |           | 3           | 5           | 7           | 6           | 4           | 8           | 2           | 1           |
|             | <b>9</b>  | 0.006778618 | 0.007326994 | 0.007661929 | 0.00710341  | 0.006778618 | 0.010253108 | 0.006830094 | 0.006851952 |
|             |           | 1           | 6           | 7           | 5           | 2           | 8           | 3           | 4           |
|             | <b>11</b> | 0.006768297 | 0.007335163 | 0.007650889 | 0.006904975 | 0.006768297 | 0.010315507 | 0.006990718 | 0.007005463 |
|             |           | 1           | 6           | 7           | 3           | 2           | 8           | 4           | 5           |
|             | <b>15</b> | 0.007038882 | 0.007373676 | 0.007952684 | 0.007518428 | 0.007038882 | 0.010114091 | 0.007397281 | 0.007290429 |
|             |           | 1           | 4           | 7           | 6           | 2           | 8           | 5           | 3           |



|                     |                     |             |             |             |             |             |             |             |             |
|---------------------|---------------------|-------------|-------------|-------------|-------------|-------------|-------------|-------------|-------------|
|                     | <b>20</b>           | 0.0074354   | 0.00771393  | 0.008033833 | 0.008116594 | 0.0074354   | 0.009696092 | 0.008165638 | 0.007906629 |
|                     |                     | 1           | 3           | 5           | 6           | 2           | 8           | 7           | 4           |
|                     | <b>Average rank</b> | 1.625       | 5.375       | 6.625       | 4.125       | 2.625       | 8           | 3.875       | 3.75        |
|                     | <b>Overall rank</b> | 1           | 6           | 7           | 5           | 2           | 8           | 4           | 3           |
| <b>PSNR</b>         | <b>2</b>            | 37.90513447 | 37.86976237 | 37.88759232 | 37.92928421 | 37.90513447 | 37.17637307 | 37.90513447 | 37.90513447 |
|                     |                     | 2           | 7           | 6           | 1           | 3           | 8           | 4           | 5           |
|                     | <b>3</b>            | 39.78347485 | 39.53467317 | 39.33621029 | 39.95321616 | 39.78347485 | 38.30391263 | 39.76793734 | 39.77449681 |
|                     |                     | 2           | 6           | 7           | 1           | 3           | 8           | 5           | 4           |
|                     | <b>5</b>            | 41.91596063 | 41.25183925 | 40.58516705 | 41.87296324 | 41.91596063 | 39.52299166 | 41.98029668 | 41.94357916 |
|                     |                     | 3           | 6           | 7           | 5           | 4           | 8           | 1           | 2           |
|                     | <b>7</b>            | 42.8767697  | 42.42342477 | 41.60519969 | 42.30653255 | 42.8767697  | 39.74283316 | 42.95830024 | 42.99330767 |
|                     |                     | 3           | 5           | 7           | 6           | 4           | 8           | 2           | 1           |
|                     | <b>9</b>            | 43.10287639 | 42.44119044 | 41.96274544 | 42.76461691 | 43.10287639 | 39.37705988 | 43.10976809 | 43.09329872 |
|                     |                     | 2           | 6           | 7           | 5           | 3           | 8           | 1           | 4           |
|                     | <b>11</b>           | 43.15391839 | 42.51181945 | 42.04519347 | 43.01573576 | 43.15391839 | 39.37786893 | 42.95054926 | 42.91896561 |
|                     |                     | 1           | 6           | 7           | 3           | 2           | 8           | 4           | 5           |
|                     | <b>15</b>           | 42.84054631 | 42.46368517 | 41.7267575  | 42.29596989 | 42.84054631 | 39.66368296 | 42.47014329 | 42.5754184  |
|                     |                     | 1           | 5           | 7           | 6           | 2           | 8           | 4           | 3           |
|                     | <b>20</b>           | 42.50925004 | 42.18108618 | 41.78623133 | 41.78359262 | 42.50925004 | 40.12518207 | 41.72195329 | 42.00248112 |
|                     |                     | 1           | 3           | 5           | 6           | 2           | 8           | 7           | 4           |
| <b>Average rank</b> | 1.875               | 5.5         | 6.625       | 4.125       | 2.875       | 8           | 3.5         | 3.5         |             |
| <b>Overall rank</b> | 1                   | 6           | 7           | 5           | 2           | 8           | 3           | 4           |             |
| <b>SSIM</b>         | <b>2</b>            | 0.899122502 | 0.89903569  | 0.898853968 | 0.899096568 | 0.899122502 | 0.903263821 | 0.899122502 | 0.899122502 |
|                     |                     | 2           | 7           | 8           | 6           | 3           | 1           | 4           | 5           |
|                     | <b>3</b>            | 0.943553456 | 0.938328039 | 0.940338492 | 0.943299093 | 0.943553456 | 0.933820179 | 0.94359472  | 0.943622205 |
|                     |                     | 3           | 7           | 6           | 5           | 4           | 8           | 2           | 1           |
|                     | <b>5</b>            | 0.960094141 | 0.956825005 | 0.955429969 | 0.958950642 | 0.960094141 | 0.952301313 | 0.959696063 | 0.959286643 |
|                     |                     | 1           | 6           | 7           | 5           | 2           | 8           | 3           | 4           |
|                     | <b>7</b>            | 0.967103657 | 0.963566326 | 0.961669232 | 0.962373651 | 0.967103657 | 0.956387075 | 0.966444468 | 0.965843939 |
|                     |                     | 1           | 5           | 7           | 6           | 2           | 8           | 3           | 4           |
|                     | <b>9</b>            | 0.968040816 | 0.96550586  | 0.962682036 | 0.96518338  | 0.968040816 | 0.953197992 | 0.96605538  | 0.966103255 |
|                     |                     | 1           | 5           | 7           | 6           | 2           | 8           | 4           | 3           |
|                     | <b>11</b>           | 0.966698706 | 0.964547351 | 0.962881108 | 0.965374855 | 0.966698706 | 0.95244396  | 0.963457452 | 0.96310098  |
|                     |                     | 1           | 4           | 7           | 3           | 2           | 8           | 5           | 6           |
|                     | <b>15</b>           | 0.962395008 | 0.961075951 | 0.958097763 | 0.958592014 | 0.962395008 | 0.951261012 | 0.957889811 | 0.958257796 |
|                     |                     | 1           | 3           | 6           | 4           | 2           | 8           | 7           | 5           |
|                     | <b>20</b>           | 0.952285735 | 0.950601859 | 0.950153839 | 0.945389883 | 0.952285735 | 0.949110132 | 0.945063572 | 0.946654672 |
|                     |                     | 1           | 3           | 4           | 7           | 2           | 5           | 8           | 6           |
| <b>Average rank</b> | 1.375               | 5           | 6.5         | 5.25        | 2.375       | 6.75        | 4.5         | 4.25        |             |
| <b>Overall rank</b> | 1                   | 5           | 7           | 6           | 2           | 8           | 4           | 3           |             |
| <b>FSIM</b>         | <b>2</b>            | 0.783245444 | 0.790174201 | 0.788739207 | 0.783965799 | 0.783245444 | 0.805333805 | 0.783245444 | 0.783245444 |
|                     |                     | 5           | 2           | 3           | 4           | 6           | 1           | 7           | 8           |
|                     | <b>3</b>            | 0.886654812 | 0.870148206 | 0.878722122 | 0.885229763 | 0.886654812 | 0.868816912 | 0.886599195 | 0.88690713  |
|                     |                     | 2           | 7           | 6           | 5           | 3           | 8           | 4           | 1           |
| <b>5</b>            | 0.885382757         | 0.893019888 | 0.891961941 | 0.889100939 | 0.885382757 | 0.891789648 | 0.882362577 | 0.882370403 |             |

|    |              |             |             |             |             |             |             |             |             |
|----|--------------|-------------|-------------|-------------|-------------|-------------|-------------|-------------|-------------|
|    |              | 5           | 1           | 2           | 4           | 6           | 3           | 8           | 7           |
| 7  |              | 0.9012638   | 0.894508085 | 0.893920648 | 0.896561566 | 0.9012638   | 0.893064994 | 0.897005489 | 0.900547928 |
|    |              | 1           | 6           | 7           | 5           | 2           | 8           | 4           | 3           |
| 9  |              | 0.902920496 | 0.900038579 | 0.89580099  | 0.898609319 | 0.902920496 | 0.8817794   | 0.892921069 | 0.89589906  |
|    |              | 1           | 3           | 6           | 4           | 2           | 8           | 7           | 5           |
| 11 |              | 0.898404241 | 0.895702624 | 0.891232473 | 0.898754889 | 0.898404241 | 0.876705235 | 0.885735163 | 0.88932479  |
|    |              | 2           | 4           | 5           | 1           | 3           | 8           | 7           | 6           |
| 15 |              | 0.89414655  | 0.893541697 | 0.885523111 | 0.883811352 | 0.89414655  | 0.871885261 | 0.878920767 | 0.884187061 |
|    |              | 1           | 3           | 4           | 6           | 2           | 8           | 7           | 5           |
| 20 |              | 0.881693989 | 0.876764771 | 0.871016988 | 0.869716933 | 0.881693989 | 0.86613282  | 0.866757318 | 0.869968346 |
|    |              | 1           | 3           | 4           | 6           | 2           | 8           | 7           | 5           |
|    | Average rank | 2.25        | 3.625       | 4.625       | 4.375       | 3.25        | 6.5         | 6.375       | 5           |
|    | Overall rank | 1           | 3           | 5           | 4           | 2           | 8           | 7           | 6           |

**Table S10.** The comparison of statistical results of the values of performance evaluation metrics for all algorithms on test image ‘img10’.
